# Supplementary material for: Myeloid Cell Crosstalk Regulates the Efficacy of the DNA/ALVAC/gp120 HIV Vaccine Candidate
Source: Front Immunol. 2019 May 14;10:1072. doi: 10.3389/fimmu.2019.01072 (PMC6527580; doi:10.3389/fimmu.2019.01072)
Supplement: Supplementary file 1 [file Table_1.XLSX]

## Sheet: SupplementaryTable2
NAME	Timepoint	HLADR-CD14+.NES	HLADR-CD14+.NOM p-val	HLADR-CD14+.FDR q-val	HLADR-CD14+.LEADING_EDGE	challenge.NES	challenge.NOM p-val	challenge.FDR q-val
SHEN_SMARCA2_TARGETS_UP	post1stALVAC.24hours	-2.27973	0	0.00124516	CAMSAP1,HLTF,ELMO2,TFCP2,TTC33,TRMT11,ARMC8,STX7,HMG20A,SEC24B,KIFAP3,USP1,SEPHS1,AKTIP,CUL4B,PAFAH1B1,PSMG2,MKKS,SUCLG1,SEC63,PDHB,MARCH7,ATP5O,SMC3,TSNAX,WDR11,DHX29,YTHDC1,SMC5,STAU1,KIAA0355,MORF4L1,ZFAND6,KDM3B,RBM22,UQCRC2,SS18,FBXO11,ATP6AP2,NFU1,LSM14A,HNRNPH2,PHF3,CHTOP,BCLAF1,RSBN1,EXOC1,ZC3H7A,COPS4,PCMT1,AASDHPPT,TAF7,ANXA7,RASA1,RAB7A,NUDT21	2.15333	0	0.000479482
MORF_SP3	post1stALVAC.24hours	-2.1905	0	0.00556552	RAD21,SMNDC1,RPA1,FBXW11,PUM2,EBAG9,DYNC1I2,LYPLA1,PARG,EIF4H,ZZZ3,PSMB4,MDH1,PRPSAP1,POGZ,MARCH7,NONO,TIAL1,MYL12B,G3BP1,G3BP2,UBR5,RTN4,BZW1,IK,PHF3,SYPL1,BAG5,HNRNPA2B1,COPS5,PPP2R5E,ZNF146,SUMO1	2.33365	0	0
DACOSTA_UV_RESPONSE_VIA_ERCC3_DN	post1stALVAC.24hours	-2.16596	0	0.00560408	SEC24B,DUSP1,KIFAP3,CKAP5,TGIF1,SHOC2,AHCTF1,ABCE1,CHST3,GBF1,SPECC1L,KLC1,FGF5,GALK2,VLDLR,RYK,MAP3K4,SATB2,ASCC3,TIPARP,NRG1,DNAJB6,SLC25A13,MBD2,TP53BP1,CNOT2,ACSL3,KIF2A,CUL1,WDFY3,CLIP1,HIVEP1,SPRED2,WDR43,SERPINB2,CUL2,ZCCHC11,FXR1,ANKRD17,NR2F2,POLR2B,PPFIA1,BDNF,ARHGEF7,MYCBP2,KLHDC10,CLASP1,JARID2,RB1CC1,PCMT1,PMS1,PPP1R12A,TNFAIP8	1.93306	0	0.0110181
GCM_DDX5	post1stALVAC.24hours	-2.2005	0	0.00627973	HNRNPM,HNRNPL,SMARCC1,CAPRIN1,EIF4H,RABGGTB,SLC25A3,MSN,DHX9,EIF4G2,SRP14,HNRNPA1,MAPRE1,NONO,TRA2B,SF1,TAF9,SRSF4,ATP5F1,YWHAZ,TCEA1,RBM3,SSR1,ARHGEF7,BCLAF1,HNRNPD,DDX5,NUP153,HNRNPA2B1,COL16A1,RB1CC1,HMGN1	1.96213	0	0.00806199
GSE25677_R848_VS_MPL_AND_R848_STIM_BCELL_DN	post1stALVAC.24hours	-2.08456	0	0.0121998	SKA2,GLRX3,MAPK6,NCOA2,DPY19L3,TJAP1,WDR46,SNX32,SH3KBP1,DHX9,OTUD4,ANXA1,SNX4,TRA2B,SF1,SPRED2,SMC5,THAP11,WWP2,PGRMC2,SS18,PIM1,BRCC3,RAB30,HERC4,CEP55,PICALM,RAP1GDS1,CIRBP,CYFIP2,GNPDA2,RAP1B,MARCH1,EXOC1,PTPN22,KLHL28,CAPZA1,CEP57,ATP6V1H,PMPCB,MAP3K1,INPP4B,ZFAND5	1.85688	0	0.0223068
MORF_RAB11A	post1stALVAC.24hours	-2.08484	0	0.0127369	PARG,PDCD10,KBTBD2,ZZZ3,TERF2IP,PRPSAP1,MARCH7,STXBP3,TPR,DPM1,PSMD10,UBR5,IK,DUSP11,BAG5,RAE1,RAB11A,PPP2R5E,ZNF410	1.85282	0	0.0233872
ENK_UV_RESPONSE_KERATINOCYTE_DN	post1stALVAC.24hours	-2.07133	0	0.0134359	PAPD7,HNRNPR,ACTL6A,DYRK2,GOLGA4,CTBP1,RRM1,NRG1,MDH1,TACC1,IGF2BP3,JAG2,SLC2A1,STXBP3,TPR,CD58,ZNF148,ACADM,ARFGEF1,CLIP1,YTHDC1,STAU1,RTCD1,GNPAT,G3BP2,TOP2B,UBR5,MAOA,AGPS,SRSF1,RP2,MYO10,POLR2B,MAPKAPK5,TARBP1,PFKM,NCOA3,GBE1,PTPN1,VRK1,COL16A1,ZNF146,SRI	1.85122	0	0.0236425
DACOSTA_UV_RESPONSE_VIA_ERCC3_COMMON_DN	post1stALVAC.24hours	-2.0497	0	0.0163199	MAPK6,NCOA2,TIPARP,FAM169A,TIAM1,SLC25A13,MBD2,TRIM2,CNOT2,ACSL3,KIF2A,WDR7,ARFGEF1,SETD2,CLIP1,ZMYM4,WDR43,RUNX1,ASAP2,PHF21A,NR2F2,TRIM37,DHX15,THBS2,MYO10,BDNF,RAB3GAP1,CRY1,PICALM,CNOT4,SRSF7,NCOA3,AKAP9,DENND5A,SOS1,ZC3H4,RASA1,TRIM33	1.81627	0	0.03161
REACTOME_CLEAVAGE_OF_GROWING_TRANSCRIPT_IN_THE_TERMINATION_REGION_	post1stALVAC.24hours	-2.01042	0	0.0235639	NFX1,CSTF1,CPSF3,UPF3B,SRSF4,LSM10,SRSF1,SNRPG,PAPOLA,CSTF3,SRSF7,NUDT21	1.8402	0	0.0262801
MILI_PSEUDOPODIA_HAPTOTAXIS_UP	post1stALVAC.24hours	-1.99011	0	0.023736	CCT4,MRPL47,PALLD,DLG3,RANBP6,DYNLT3,UGP2,RPF2,PDCD10,ARMCX3,SLU7,CENPK,ZNF326,UBA3,ABCB7,CNOT2,KIF2A,PBRM1,DIXDC1,SNX5,WDR43,CUL2,SMC5,LARP7,IWS1,FXR1,CCNC,SELT,TBC1D15,CAPZA2,TCEA1,ZNF24,UBE2V2,SRSF1,BZW1,ZBTB12,PPFIA1,BHLHB9,RBM25,HNRNPH2,SOS1,INTS6,RPS6KA6,KIF5B,VAMP7,AASDHPPT,SUMO1,RASA1,GPBP1,EIF3J,PPP1R12A	1.81241	0	0.0322405
GSE13485_CTRL_VS_DAY1_YF17D_VACCINE_PBMC_UP	post1stALVAC.24hours	-1.99989	0	0.0238506	SPAG1,EGR3,COX5A,FBXO5,ASCC3,NUP35,PHF20L1,KIN,UNC50,CLNS1A,PAPOLG,MED23,PPP2R3C,TMEM170A,EEF1E1,TM9SF2,MGAT2,ZNF200,GOSR2,KPNA1,LRRC57,STAU1,ZNF230,KLHL12,MUDENG,SELT,DERL2,TNFSF14,RP2,RBM15,SLC25A12,ZNF684,PHF3,RRAGA,DUSP11,TOX4,ATP6V1H,COPS5,PTPMT1,ZNF410,ERLEC1	1.75933	0	0.0468933
ATGTTAA_MIR302C	post1stALVAC.24hours	-2.00416	0	0.023991	FGFR2,KIAA0355,BHLHE40,FXR1,ST6GALNAC3,SF3B1,DAAM1,UBE2V2,LRCH2,ADD3,RAI1,SPTY2D1,PPA2,PPP5C,ATP2C1,SPOP,CYFIP2,RAP1B,KLHDC10,CSMD3,GGNBP2,VEZF1,B4GALT5,HNRNPA2B1,FBXO21,PPP2R5E,LPHN3,CREBZF,DDX3Y,CGGBP1,RAB7A,EIF3J,FBXO33	1.77156	0	0.042604
ATATGCA_MIR448	post1stALVAC.24hours	-2.00106	0	0.0240932	FBXW11,APBB2,PDP1,RBM26,BRD1,ANK2,BRP44L,DYNLT3,DNAJB11,VLDLR,PURA,TBX3,NCOA2,DYRK2,WRNIP1,SH3KBP1,TPP2,DOC2A,TCEAL1,GPHN,RNF19A,CLK1,AUTS2,LRRC57,CAP1,TRAPPC10,TMSB4X,SF3B1,RNF182,SS18,DNM3,MEF2C,CRY1,GRIK2,PHF3,SERBP1,SRSF10,ADAM10,KCNB1,BACH2,ELL2,ADD1,VEZF1,IMPAD1,KLHL5,HNRNPA2B1,ING3,ARNTL,ELF2,WTAP,RAB7A,FBXO33,MAP2K6	1.75367	0	0.048654
SPIELMAN_LYMPHOBLAST_EUROPEAN_VS_ASIAN_DN	post1stALVAC.24hours	-1.98729	0	0.0243249	CYB5R4,PUM2,UGP2,MED21,CDC16,GBF1,NDUFS4,ATP6V0E1,GOLGA4,DLD,GOLGA7,RBM7,PPP1CC,PRPSAP1,CDYL,ATP5O,MAPRE1,GOSR2,ZNF148,CUL1,ATXN1,CRADD,CCNH,WBP4,G3BP2,LPAR6,CCNC,DHX15,MCL1,ALG6,RBM3,MEF2C,PICALM,RAD50,ARHGEF7,GALC,HSPA14,PTPN22,ADH5,PPP3CB,ANXA11,NFKB1,KIF5B,MED6,SNX3,EIF2B3,SLC25A40,TFG	1.86189	0	0.0214696
GSE39820_TGFBETA1_VS_TGFBETA3_IN_IL6_TREATED_CD4_TCELL_UP	post1stALVAC.24hours	-1.98358	0	0.0247557	NCOA6,NAB1,CASD1,CNTROB,LYPLA1,CSNK2A2,PRICKLE3,DEDD,MAP3K4,DDX54,STT3B,RIC8A,PPP1CC,ARID2,MARCH7,SLC2A1,MAPRE1,ACSL3,RGN,ANKRD33,CLIP1,DENND4A,CDC42SE1,G3BP2,YWHAZ,CTNNB1,ARL6IP6,CAPZA2,POP1,TPM3,DR1,ZNF655,TTC13,LSM14A,HERC4,ATP2C1,BTAF1,GPAM,STYX,ACVR1,LPGAT1,TOX4,DDX5,UBE2H,KIAA1826,SNAP23,NUP153,CAPZA1,CPNE3,MAP3K1,UBL3,ZNF451	1.82357	0	0.0293477
GCM_RAD21	post1stALVAC.24hours	-1.97581	0	0.0255134	EIF4G2,NAE1,SRP14,HNRNPA1,TPR,NONO,TRA2B,SRSF4,YWHAZ,TCEA1,BCLAF1,DDX5,WAPAL,COPS5,SUMO1,HMGN1	2.21642	0	0
2	post1stALVAC.24hours	-1.97648	0	0.0258689	C1D,LSM3,EDC4,DCP1A,LSM5,EXOSC5,EXOSC1,PAPD7,HSPD1,TTC37,PAPOLB,PAPOLG,CNOT2,EXOSC3,CNOT7,CNOT6L,PAPOLA,CNOT4,CNOT10,XRN2,CNOT8,NAA38	1.87805	0	0.0175782
GSE20151_CTRL_VS_FUSOBACT_NUCLEATUM_NEUTROPHIL_DN	post1stALVAC.24hours	-1.95375	0	0.0266616	PEF1,GLRX3,KLF11,DDX54,SAA4,POLR2G,INTS8,MDH1,KCNA4,RBBP7,ZCCHC8,COMMD8,MBD2,PSMD12,POMP,IPPK,DHX29,CHUK,USP4,PRMT2,GNPAT,KDM3B,JMJD1C,PPP1CA,UQCRC2,PSENEN,THUMPD1,SLC25A24,CRY1,GRIK2,PHF3,MGAM,CORO1A,RSBN1,TIA1,INTS6,CCND3,MED6,SAP18,PTEN,SUMO1,YIPF4,DOCK10	1.81409	0	0.0323939
DACOSTA_UV_RESPONSE_VIA_ERCC3_XPCS_DN	post1stALVAC.24hours	-1.94241	0	0.0275727	CUL2,ZEB2,SLC25A12,BDNF,MSH6,HERC4,ATP2C1,SON,NFKB1,RB1CC1,PCCA,PTEN,WDR37,MPHOSPH9	1.95845	0	0.00840833
GNF2_TDG	post1stALVAC.24hours	-1.93112	0	0.0296617	PTGES3,SUMO2,XPO1,RPA1,HNRNPK,MAGOH,HNRNPM,HNRNPR,ZCCHC8,TRA2B,DHX15,SRSF1,PAPOLA,SERBP1,NUP153,SRI	2.12164	0	0.000839308
REACTOME_PROCESSING_OF_CAPPED_INTRON_CONTAINING_PRE_MRNA	post1stALVAC.24hours	-1.93399	0	0.0296908	HNRNPM,HNRNPL,YBX1,SEH1L,NUP93,EIF4E,HNRNPR,DNAJC8,NFX1,POLR2G,NUP35,DHX9,CSTF1,HNRNPA1,TPR,NUP37,CPSF3,UPF3B,POM121,SNRPB2,SRSF4,SF3B1,SRSF1,SNRPG,RBM5,POLR2B,HNRNPH2,PAPOLA,CSTF3,HNRNPD,SRSF7,NUP210,NUP153,NUPL2,RAE1,HNRNPA2B1,NUDT21	1.94172	0	0.010058
GSE360_CTRL_VS_L_DONOVANI_MAC_DN	post1stALVAC.24hours	-1.93291	0	0.0296973	KDELR1,IKZF1,SPINK4,ODC1,IDS,PIGA,NFX1,TNNC2,OTUD4,PROSC,STXBP3,DHX29,CHUK,LETMD1,SREBF1,PHIP,WSB2,ITGB4,WBP4,ATP5F1,ATP1B3,TRIM37,CSF2RB,CTNNB1,DHX15,UBE2V2,THBS2,AMHR2,ADD3,MAPKAPK5,HNRNPH2,OXSR1,PHF8,PDHX,RSBN1,RAP1B,PTPN22,PARVA,SNAP23,CAPZA1,CLDND1,VEZF1,HNRNPA2B1,ZMYM2	1.82311	0	0.0291268
HAMAI_APOPTOSIS_VIA_TRAIL_UP	post1stALVAC.24hours	-1.92073	0	0.0324515	CCDC91,ZNF407,MMD,DIAPH3,PSMA4,FPGT,RBBP8,PALLD,PAPSS2,CUL4B,SPINK1,PDCD10,ARMCX3,ITPR1,BIRC2,SLU7,PCM1,ZMYM1,REV3L,LRRC40,PSMD12,SMC3,RSF1,WDR11,NIN,ASPM,USP48,ETAA1,CAST,ZNF85,CLIP1,BAZ1A,RAPGEF6,PPWD1,PIK3CA,RALA,MRPS31,RPAP3,ANKRD32,ADD3,USO1,SNX13,ADAM9,DNAJC3,CEP57,VRK1,PCCA,SLMAP,MGAT4A,DOCK10	1.82943	0	0.0287776
MORF_CDC10	post1stALVAC.24hours	-1.91668	0.0016129	0.0339175	BRD8,SMNDC1,HNRNPK,ZC3H15,USP1,CCT4,SHOC2,LBR,PUM2,HNRNPL,PRKAG1,CAPRIN1,GTF2A2,HNRNPR,NAP1L4,GAK,VDAC3,PRKDC,RPA2,DYRK2,SEPT7,TERF2IP,DNAJC8,TACC1,PTP4A2,SEC63,ARPC3,NAE1,TP53BP1,CHUK,PRKRA,NONO,PHIP,TIAL1,POM121,CUL2,SMC5,KDM3B,TCEA1,ATXN2L,TRRAP,HNRNPH2,ARHGEF7,HNRNPD,STK24,CAPZA1,ADD1,HNRNPA2B1,PSMA1	2.04027	0	0.00296657
SCHLOSSER_SERUM_RESPONSE_DN	post1stALVAC.24hours	-1.91309	0	0.034648	SEC24B,PSMA4,KIFAP3,GLRX,RAD17,MAGOH,TGM2,DYNLT3,PAFAH1B1,PDCD10,RUNX2,ETS2,SLC25A5,NCOA2,DHX9,SSBP2,UBA3,MARCH7,PEX2,GTF2B,WDR7,EDIL3,LY75,SNRPB2,SMC5,PPWD1,RCN2,PPP1R8,TOP2B,RTN4,TCEA1,RP2,SNRPG,SERPINI2,CRY1,SERBP1,DUSP11,RAP1B,DDX5,TCAP,CPNE3,COPS5,MED6,PSMA1,ZFYVE16,RB1CC1	1.77328	0	0.0418376
MAYBURD_RESPONSE_TO_L663536_DN	post1stALVAC.24hours	-1.91388	0	0.0346858	MSH2,MED21,EZR,SNX10,HMMR,ACTB,KPNA1,SNX5,PCID2,PLSCR1,CCNC,SELT,ZNF207,PPA2,CSTF3,GNPDA2,ZNF585A,SRSF7	1.87827	0	0.0179395
DING_LUNG_CANCER_EXPRESSION_BY_COPY_NUMBER	post1stALVAC.24hours	-1.90059	0	0.0380432	PIK3CA,FXR1,THOC1,H2AFY,IPO8,PPFIA1,THUMPD1,COG3,AKAP9,METTL4,GZF1,COG5,NUP153,RAE1,RB1CC1,MAP3K1,RASA1,NAPG,PPP1R12A,FBXO33	1.9535	0	0.00867874
REACTOME_MRNA_3_END_PROCESSING	post1stALVAC.24hours	-1.89192	0	0.0409011	NFX1,CSTF1,CPSF3,UPF3B,SRSF4,SRSF1,PAPOLA,CSTF3,SRSF7,NUDT21	1.88075	0.00128535	0.0175274
REACTOME_MRNA_PROCESSING	post1stALVAC.24hours	-1.88786	0	0.0413407	HNRNPM,HNRNPL,YBX1,SEH1L,NUP93,EIF4E,HNRNPR,DNAJC8,NFX1,POLR2G,NUP35,DHX9,CDK7,CSTF1,HNRNPA1,TPR,NUP37,CPSF3,UPF3B,POM121,ADARB1,SNRPB2,CCNH,SRSF4,SF3B1,LSM10,SRSF1,SNRPG,RBM5,POLR2B,HNRNPH2,PAPOLA,CSTF3,HNRNPD,SRSF7,NUP210,NUP153,NUPL2,RAE1,HNRNPA2B1,NUDT21	2.00976	0	0.00435522
ATACTGT_MIR144	post1stALVAC.24hours	-1.87518	0	0.0433009	PURA,MAPK6,PPARA,VKORC1L1,ARID2,EIF4G2,SOBP,GATA3,NIN,FBXO32,KPNA1,CLK1,AGRN,WDFY3,ARFGEF1,ATXN1,ZNF800,ZEB2,RBM12,ST6GALNAC3,NR2F2,SS18,NFE2L2,PUM1,KBTBD8,PIM1,ZNF207,LSM14A,CHTOP,NEDD4,UBE2D3,SRSF10,BACH2,ELL2,FAM126B,CAPZA1,BRPF1,DLG5,WTAP,ARID5B	1.79607	0	0.0365084
GSE9006_HEALTHY_VS_TYPE_1_DIABETES_PBMC_1MONTH_POST_DX_UP	post1stALVAC.24hours	-1.87519	0	0.0437056	EZR,MTHFD1,HNRNPR,PCNP,NRAS,TRAM1,TOMM22,SEC31A,PRKDC,IDS,MSN,PTP4A2,ACO2,MBD2,COPS7B,HNRNPA1,MAPRE1,RBBP4,UQCRC1,SNTB2,OSTF1,STAU1,G3BP2,YWHAZ,CORO1C,DAZAP2,ACTG1,AGPS,MATR3,MAPK1IP1L,RBM3,DR1,LSM14A,RNF38,HNRNPH2,HNRNPD,ADAM10,HIF1A,CSNK1G3,BNIP2,PPP3CB,CPNE3,STX8,NADSYN1,UGCG,WTAP,KDELR2,MAP2K1,NAPG	2.01164	0	0.00463782
SESTO_RESPONSE_TO_UV_C0	post1stALVAC.24hours	-1.87973	0	0.0442976	YWHAH,PSMA4,RIT1,RBM4,QSOX1,RNF113A,GTF2A2,TUBA1A,TRAM1,KPNA4,HCCS,PRNP,PPP1CC,CDK7,EIF4G2,NFKBIA,ADM,ANXA1,GTF2B,TAF9,DAZAP2,HMOX1,UBE2V2,DR1,HNRNPH2,RRAGA,ERBB3,SON,KPNA2,CTR9,TCEB1,SAP18,TAF7,WTAP	1.97799	0	0.00719761
GARY_CD5_TARGETS_DN	post1stALVAC.24hours	-1.87722	0	0.0447747	FAM98A,ANAPC7,GTF2H2,UBAP2L,USP15,RBM4,BTN3A3,ERCC6L,HNRNPM,RANBP6,PAK1IP1,IKZF1,ATP6V0E1,MRPL32,ASCC3,DHX9,DDX20,MYBL1,ZDHHC16,MGAT2,PBRM1,PSMD13,GPR183,PPWD1,PSMC5,PLEKHF2,ATP6V1C1,RPF1,MATR3,SRSF1,CCT6A,MRPL15,BZW1,RBM3,RBM25,AP4B1,TLR10,PAPOLA,CNOT4,BCLAF1,GEMIN6,HNRNPD,TIA1,BAG5,KIAA1826,POLE2,RRP9,TUBA4A,SAP18,TNFAIP8	1.76069	0	0.0460914
GNF2_MLH1	post1stALVAC.24hours	-1.8586	0.00182815	0.0467952	SMC3,RBBP4,SRSF1,TCERG1,MSH6,SERBP1,PA2G4,NUP153,HNRNPA2B1,H2AFZ	1.77934	0.00493827	0.0400687
GO_REGULATION_OF_VACUOLAR_TRANSPORT	post1stALVAC.24hours	-1.8396	0.00186916	0.0490647	MSN,EHD1,MAPK1,INPP5F,SNX12,SNX3,VAMP7,MAP2K1	1.79625	0	0.0367815
GCM_PSME1	post2ndALVAC.1week	-2.05278	0	0.0170494	HNRNPM,SAP18,EIF3F,MYL12A,ZNHIT3,TMSB10,CBFB,POLG,PSMA1,TRA2B,RABGGTB,PSMA5,SLC25A3,CLIC1,SUMO2,IK,YWHAZ,RPL27,EEF1B2,RPS5,SET,ILF2,MSN,HMGN1,BRD8,POLR2G,PSMA6,NASP,H2AFZ,PFN1,PSME1,COPS5	2.04401	0	0.0437306
GSE30962_PRIMARY_VS_SECONDARY_ACUTE_LCMV_INF_CD8_TCELL_UP	post2ndALVAC.1week	-2.07863	0	0.0176393	KIF23,DBI,GEMIN6,MPP6,IPO11,BTLA,BUB1B,IFT80,KALRN,REXO2,TCP10L,STT3B,ESPL1,KPNA2,EIF4A1,UCP3,MCM3,EOMES,KIAA0101,RRM1,EXO1,CKS2,CKS1B,AURKB,EYA1,KPTN,CCNA2,HYAL2	1.91748	0	0.0430582
SONG_TARGETS_OF_IE86_CMV_PROTEIN	post2ndALVAC.1week	-2.06162	0	0.0179555	FOXM1,RFC4,TPX2,MCM7,MCM5,MCM6,CSPG5,PCNA,BARD1,BLM,DDX52,E2F1,TOPBP1,RFC2,DDX23,FADS3,RPA1,BTG3,NUP214,MYBL2,PTTG1,SLC29A1,NASP,FEN1,MCM3,ZWINT,KIAA0101,RRM1,RAD51C	1.88852	0	0.0497769
REACTOME_M_G1_TRANSITION	post2ndALVAC.1week	-1.99734	0	0.0195804	MCM7,PSMB1,MCM5,MCM6,PSMB10,PSME2,POLE2,PSMA3,PSMD6,PSMB5,E2F1,PSMA1,PSMA4,PSMA5,RPA2,PSMD10,RPA1,RPS27A,PSMC5,PSMD12,ORC5,PSMB6,PSMA6,PSMB2,MCM3,PSME1,PSMB4,PSMA2	1.98957	0	0.0353273
MORF_FEN1	post2ndALVAC.1week	-2.0081	0	0.0197801	HSPE1,SOD1,MTHFD1,ESPL1,KPNA2,PSMB2,FEN1,H2AFZ,MCM3,ZWINT,KIAA0101,RRM1,VDAC1,HSPA9	1.86688	0	0.0492593
REACTOME_ASSEMBLY_OF_THE_PRE_REPLICATIVE_COMPLEX	post2ndALVAC.1week	-2.02592	0	0.0213704	MCM7,PSMB1,MCM5,MCM6,PSMB10,PSME2,PSMA3,PSMD6,PSMB5,E2F1,PSMA1,PSMA4,PSMA5,PSMD10,RPS27A,PSMC5,PSMD12,ORC5,PSMB6,PSMA6,PSMB2,MCM3,PSME1,PSMB4,PSMA2	2.00414	0	0.0301551
MORF_RAN	post2ndALVAC.1week	-1.91714	0	0.030789	NONO,NEDD8,SHFM1,RPS10,ANP32B,PSMA4,TUBA1B,SLC25A3,SUMO2,BUB3,TMEM147,SRP14,CLNS1A,RAN,PGAM1,YWHAZ,HAX1,EIF3H,NME1,RPS5,EEF1E1,SSR2,RPS27A,FAU,SET,EIF3E,ILF2,RAD21,PCMT1,HMGN1,XPO1,RPL24,SOD1,SUMO1,RUVBL2,PSMB6,SNRPG,EIF4A1,H2AFZ,MDH1,SNRPB2,PSMB4,PPP1CA,COPS5,SLC25A5,STOML2,PSMA2,ATP5O	1.90345	0	0.0474694
REACTOME_CELL_CYCLE_CHECKPOINTS	post2ndALVAC.1week	-1.90647	0	0.0323421	MCM7,CDC16,PSMB1,MCM5,ATRIP,MCM6,PSMB10,PSME2,PSMA3,PSMD6,ANAPC1,PSMB5,CHEK2,PSMA1,PSMA4,PSMA5,RFC2,BUB3,RPA2,UBE2C,RAD17,PSMD10,RPA1,RPS27A,PSMC5,PSMD12,ORC5,BUB1B,PSMB6,PSMA6,PSMB2,MCM3,ANAPC10,PSME1,PSMB4,PSMA2	1.87336	0	0.0481662
REACTOME_APC_C_CDH1_MEDIATED_DEGRADATION_OF_CDC20_AND_OTHER_APC_C_CDH1_TARGETED_PROTEINS_IN_LATE_MITOSIS_EARLY_G1	post2ndALVAC.1week	-1.88604	0	0.0336899	AURKA,CDC16,PSMB1,PSMB10,PSME2,PSMA3,PSMD6,ANAPC1,PSMB5,PSMA1,PSMA4,PSMA5,UBE2C,PSMD10,RPS27A,PSMC5,PSMD12,PTTG1,PSMB6,PSMA6,PSMB2,ANAPC10,PSME1,AURKB,PSMB4,PSMA2	1.86863	0	0.0490685
REACTOME_G1_S_TRANSITION	post2ndALVAC.1week	-1.88983	0	0.0339314	MCM7,PSMB1,MCM5,MCM6,PSMB10,PCNA,PSME2,TFDP1,POLE2,PSMA3,CCNH,PSMD6,PSMB5,E2F1,PSMA1,PSMA4,PSMA5,RB1,RPA2,PSMD10,FBXO5,RPA1,RPS27A,PSMC5,PSMD12,ORC5,MNAT1,PSMB6,PSMA6,PSMB2,MCM3,CKS1B,PSME1,PSMB4,CCNA2,PSMA2	1.92442	0	0.0400342
REACTOME_REGULATION_OF_MITOTIC_CELL_CYCLE	post2ndALVAC.1week	-1.89005	0	0.0341692	AURKA,CDC16,PSMB1,PSMB10,PSME2,PSMA3,PSMD6,ANAPC1,PSMB5,PSMA1,PSMA4,PSMA5,BUB3,UBE2C,PSMD10,FBXO5,RPS27A,PSMC5,PSMD12,PTTG1,BUB1B,PSMB6,PSMA6,PSMB2,ANAPC10,PSME1,AURKB,PSMB4,CCNA2,PSMA2	1.93221	0	0.0399485
REACTOME_SYNTHESIS_OF_DNA	post2ndALVAC.1week	-1.86238	0	0.0378209	MCM7,PSMB1,MCM5,MCM6,PSMB10,PCNA,PSME2,POLE2,PSMA3,PSMD6,PSMB5,PSMA1,PSMA4,PSMA5,RB1,RFC2,RPA2,PSMD10,RPA1,RPS27A,PSMC5,PSMD12,ORC5,PSMB6,PSMA6,PSMB2,FEN1,MCM3,PSME1,PSMB4,CCNA2,PSMA2	1.98016	0	0.0319418
GCM_ACTG1	post2ndALVAC.1week	-1.85725	0	0.0385193	DUT,SNRPB,PPP1CC,RPL9,TIAL1,HNRNPA2B1,YWHAQ,HNRNPM,SAP18,EIF3F,ZNHIT3,PSMD6,TMSB10,NONO,EIF4G2,CBFB,RPS3,PSMA1,TRA2B,PSMA5,SLC25A3,CLIC1,SUMO2,HMGN2,SRP14,IK,FXR1,HNRNPK,YWHAZ,RPL27,EEF1B2,UQCRC2,SSR2,RPS27A,SET,ILF2,HMGN1,BRD8,POLR2G,EIF4A1,H2AFZ,PSME1,PSMB4,COPS5	2.00805	0	0.0317677
REACTOME_MITOTIC_M_M_G1_PHASES	post2ndALVAC.1week	-1.85781	0	0.0390215	MCM7,SEC13,PSMB1,MCM5,MCM6,NUP37,PSMB10,CENPL,PSME2,POLE2,CENPA,PSMA3,PSMD6,PSMB5,E2F1,PSMA1,PSMA4,PSMA5,ERCC6L,CENPK,BUB3,RPA2,INCENP,SEH1L,PAFAH1B1,PSMD10,FBXO5,RPA1,KIF23,RPS27A,PSMC5,PSMD12,RAD21,ORC5,SMC3,XPO1,BUB1B,PSMB6,MAPRE1,PSMA6,PPP2R5E,PSMB2,MCM3,ZWINT,PSME1,AURKB,PSMB4,PSMA2	1.94085	0	0.0403466
REACTOME_SCF_BETA_TRCP_MEDIATED_DEGRADATION_OF_EMI1	post2ndALVAC.1week	-1.85933	0.00173913	0.0391276	PSMB10,PSME2,PSMA3,PSMD6,PSMB5,PSMA1,PSMA4,PSMA5,PSMD10,FBXO5,RPS27A,PSMC5,PSMD12,PSMB6,PSMA6,PSMB2,PSME1,PSMB4,PSMA2	1.89458	0	0.0484897
REACTOME_METABOLISM_OF_RNA	post2ndALVAC.1week	-1.83352	0	0.043344	MAGOH,RPL9,LSM5,RPL10,RPL13A,PSMB1,EIF4B,PRMT5,RPL27A,PSMB10,PSME2,PSMA3,CNOT7,DCP1A,NUP35,RPL8,CNOT2,PSMB5,EXOSC3,PATL1,RPS3,RPL15,LSM6,PSMA1,PSMA4,PSMA5,CLNS1A,PSMD10,RPL27,ELAVL1,EXOSC9,HSPA8,FAU,PSMC5,PSMD12,NUPL2,CNOT10,RPL24,PSMB6,PSMA6,PSMB2,EXOSC7,EIF4A1,CNOT4,LSM3,NUP210,PSME1,PSMB4,PSMA2	1.90502	0	0.0482944
REACTOME_S_PHASE	post2ndALVAC.1week	-1.83059	0	0.0433595	MCM7,PSMB1,MCM5,MCM6,PSMB10,PCNA,PSME2,POLE2,PSMA3,CCNH,PSMD6,PSMB5,PSMA1,PSMA4,PSMA5,RB1,RFC2,RPA2,PSMD10,RPA1,RPS27A,PSMC5,PSMD12,ORC5,MNAT1,PSMB6,PSMA6,PSMB2,FEN1,MCM3,CKS1B,PSME1,PSMB4,CCNA2,PSMA2	1.93317	0	0.0422763
GCM_APEX1	post2ndALVAC.1week	-1.83171	0	0.0437192	EIF4B,MCM6,YWHAQ,HNRNPM,EIF3F,ZNHIT3,NONO,CBFB,POLG,PSMA1,TRA2B,PSMA5,SLC25A3,CLIC1,SUMO2,PWP1,IK,FXR1,YWHAZ,RPL27,TAF9,EEF1B2,RPS5,SET,ILF2,RAD21,HMGN1,ERH,POLR2G,PSMB2,NASP,EIF4A1,H2AFZ,MCM3,PFN1,PSME1,COPS5	1.88377	0	0.0484866
HALLMARK_E2F_TARGETS	post2ndALVAC.1week	-1.8168	0	0.0451969	SRSF1,TRA2B,RFC2,RPA2,NUDT21,DEPDC1,PLK4,RAN,ASF1A,DONSON,PDS5B,AK2,PRKDC,CSE1L,PPP1R8,NME1,RPA1,NUP153,PA2G4,RAD21,SHMT1,MYBL2,SMC3,XPO1,PTTG1,BUB1B,ESPL1,KPNA2,NASP,H2AFZ,MCM3,CKS2,CKS1B,AURKB,RAD51C,RAD50,CDKN3,CBX5,POLE4	2.00864	0	0.038959
HALLMARK_INTERFERON_GAMMA_RESPONSE	post2ndALVAC.24hours	-2.32482	0	0	IFIT1,OASL,WARS,OAS2,NUP93,SELP,ISG20,IFIH1,ITGB7,IFI44L,SLC25A28,TDRD7,TAPBP,TRIM14,DDX60,IL7,SSPN,STAT1,PLSCR1,NFKBIA,P2RY14,RAPGEF6,TRIM21,NMI,USP18,PSMA3,DHX58,NCOA3,HIF1A,CMPK2,LCP2,CFB,GBP6,AUTS2,PSMB2,IRF7,CD40,CSF2RB,TNFSF10,SOCS1,FGL2,ST8SIA4,GPR18,GCH1,NLRC5,MARCH1,JAK2,RIPK2,PSMB10,PSME2,NFKB1,PTPN1,CASP8,CASP7,TAP1,IDO1,SERPING1,PSME1,TXNIP,PSMA2	2.09384	0	0.00448724
SESTO_RESPONSE_TO_UV_C0	post2ndALVAC.24hours	-2.35122	0	0	HMOX1,PSMD6,CITED2,NFKBIA,DR1,CDK7,RELA,WTAP,PSMA3,SET,CDC37,RNF113A,BRD2,IL1RN,RRAGA,HNRNPH2,YWHAH,ANXA1,DAZAP2,COPS2,HCCS,RBM4,ADM,KPNA2,TAP1,SAP18,HSPH1,EIF4G2,UBE2V2,DNAJA1,PSMA4,M6PR,TAF7,PPP1CC,SON	2.05976	0	0.00465162
MORF_CDC10	post2ndALVAC.24hours	-2.29545	0	0	SHOC2,TCEA1,PRKRA,HNRNPK,BMS1,NSA2,TRRAP,RPA2,STK24,DNAJC8,EIF3M,SUMO2,ARHGEF7,XRCC5,ADD1,VDAC3,PGK1,ILF2,NAP1L4,HNRNPH2,HNRNPH3,COPS2,HNRNPA2B1,TIAL1,YWHAQ,DUT,NAE1,KDM3B,PRKAG1,PTP4A2,TP53BP1,TAX1BP1,HNRNPD,NONO,XPO1,HNRNPL,HNRNPR,CAPZA1,EIF4A2,TERF2IP,HSPA8	2.10847	0	0.0046521
SHEN_SMARCA2_TARGETS_UP	post2ndALVAC.24hours	-2.38187	0	0	RAB7A,SMC3,HMG20A,ZFAND6,SMARCA5,KIFAP3,NPEPPS,NPTN,SUCLG1,PDHB,PREPL,CHMP5,DHX29,RASA1,XRCC5,DDX1,ATP6AP2,SS18,WDR11,SETX,NUDT21,ATP5O,NEK7,RB1,HNRNPH2,PAFAH1B1,PPP2R5C,EXOC1,PSMG2,RBM22,CEP350,STX7,PHF3,YTHDC1,MORF4L1,KDM3B,CHTOP,TSNAX,ANXA7,CSE1L,NFU1,RSBN1,UQCRC2,ZC3H7A,BCLAF1,TAF7,COPS4	2.14181	0	0.0069842
SPIELMAN_LYMPHOBLAST_EUROPEAN_VS_ASIAN_DN	post2ndALVAC.24hours	-2.29093	0	0	PDK3,WBP4,CRADD,SNX3,ATP6V0E1,PTPN22,ATP6V1B2,CDC16,MIPEP,GALC,GOLGA4,HSPA14,RELA,PSMA3,ARHGEF7,CUL1,ATP5O,PRPSAP1,LPAR6,TNFSF10,ANXA2,UGP2,MCL1,VDAC1,ALG6,EIF2B3,NFKB1,G3BP2,CCNC,RAD50,TAX1BP1,MEF2C,ADH5,CDYL,TFG,DHX15,GOSR2,PPP1CC,KIF5B	1.96182	0	0.00722117
GSE1432_CTRL_VS_IFNG_24H_MICROGLIA_DN	post2ndALVAC.24hours	-2.36639	0	0	CSTF3,ISG20,IFIH1,HIST1H1T,SFT2D2,RHOBTB3,RCN1,TDRD7,STAP1,AK2,MYOF,DDX60,N4BP1,SSPN,STAT1,P2RY14,NMI,DR1,AMD1,CUL1,AIM2,CFB,TAP2,GBP1,PSMB2,IRF7,TMX1,CD40,FAM69A,GLRX,BAZ1A,TNFSF10,SOCS1,FGL2,SOS1,GCH1,MCL1,SYNC,SNX10,PRPS2,RAPGEF2,JAK2,ERAP2,PSMB10,PSME2,EZH2,LAG3,DDX47,GBP2,TAP1,IDO1,SP140,PSMA4,SERPING1,PSME1,MTHFD1,PSMA2	1.96862	0	0.00733894
GSE1432_1H_VS_6H_IFNG_MICROGLIA_DN	post2ndALVAC.24hours	-2.31641	0	0	IFI44L,RCN1,TDRD7,DDX60,GABPB1,PRPF3,STAT1,NPEPPS,AKAP12,NMI,USP15,DR1,AMD1,PSMA3,VPS54,CUL1,NCOA3,ARAP2,CFB,GBP1,PSMB2,IRF7,CD40,CSF2RB,BAZ1A,TNFSF10,SLAMF8,UTP6,RAPGEF2,JAK2,ERAP2,PRPF40A,PSME2,SRP54,ASCC3,FNTA,GBP2,CASP7,PDCD1LG2,TAP1,IDO1,GTF2E2,DNAJA1,CDKN2AIP,USO1,ZC3H7A,PSMA4,SERPING1,PSMA2	1.97003	0	0.00735387
FLECHNER_BIOPSY_KIDNEY_TRANSPLANT_OK_VS_DONOR_UP	post2ndALVAC.24hours	-2.3087	0	0	TOPORS,SLC17A3,TAPBP,HNRNPK,GALC,OAT,CREB1,PROSC,CNIH,BZW1,GBE1,NPTN,LUC7L3,ARFGEF1,NMI,AMD1,PSMA3,ADD3,NCOA3,AUTS2,TTC37,AHCYL1,GBP1,TANK,AKR1C3,CFDP1,RRAGA,TOP2B,COPS5,FGL2,EIF3F,GCH1,DPM1,ANP32A,FPGT,ZNF146,DYNC1I2,SIAH1,PHF3,GOT2,FNTA,SLC16A4,MORF4L2,DNAJA1,DDX5,HSPE1,PSMA4,RAN,HNRNPR,RAP1B,ZMYM2,HSPA8	1.98247	0	0.00742312
GSE25677_R848_VS_MPL_AND_R848_STIM_BCELL_DN	post2ndALVAC.24hours	-2.51343	0	0	OXCT1,DNAJA2,USP15,KLHL28,CIRBP,SNX4,CEP55,SESN1,GLRX3,TSC22D3,SMURF2,ARAP2,TRIP4,SS18,CRLF3,MAPK6,RAPGEF1,MAP3K1,RAB30,CSDE1,CCNI,NCOA2,ANXA1,EXOC1,ATP6V1H,TJAP1,SNX32,DHX9,YBX1,MARCH1,JAK2,THAP11,PMPCB,CASP7,TRA2B,CYFIP2,CEP57,RAP1GDS1,HERC4,ZFAND5,INPP4B,RAP1B,CAPZA1,GNPDA2	1.9344	0	0.00883724
GCM_RAD21	post2ndALVAC.24hours	-2.34326	0	0	TCEA1,RAD21,APEX1,SUMO2,SRP14,HNRNPA1,HNRNPM,SET,YWHAZ,ILF2,COPS5,YWHAQ,NAE1,SUMO1,TRA2B,NONO,EIF4G2,DDX5,BCLAF1,SRSF4,TPR	1.91133	0	0.00985495
GSE1432_1H_VS_24H_IFNG_MICROGLIA_DN	post2ndALVAC.24hours	-2.36009	0	0	MYOF,NSMCE4A,DDX60,RPAP3,GUCY1A3,SSPN,STAT1,NMI,USP15,DR1,CETN3,DHX58,CUL1,CFB,TAP2,GBP1,PSMB2,RBBP6,IRF7,FAM69A,BAZ1A,TNFSF10,SLAMF8,RTCD1,UTP6,PRPS2,JAK2,ERAP2,THAP11,PSMB10,PSME2,PDIA3,LAG3,MAT2B,ASCC3,FNTA,DDX47,GBP2,RAD50,TAP1,IDO1,DNMT1,GTF2E2,SP140,PSMA4,SERPING1,PSME1,MTHFD1,PSMA2	1.79271	0	0.0262865
GCM_PPP1CC	post2ndALVAC.24hours	-2.57375	0	0	APEX1,PWP1,IK,SUMO2,ATP5F1,HNRNPM,SET,NASP,POLG,ILF2,PSMA5,EIF3F,YWHAQ,DUT,NAE1,ACTG1,HNRNPD,TRA2B,NONO,EIF4G2,ATP5A1,SLC25A3,SRSF4,PPP1CC,CAPZA1,PPP1R8,TPR	1.73941	0.00124224	0.0382968
GSE9006_HEALTHY_VS_TYPE_1_DIABETES_PBMC_1MONTH_POST_DX_UP	post2ndALVAC.24hours	-2.35723	0	0	CPNE3,RBM3,PRKDC,ACO2,KCTD3,STK17B,STT3A,NRAS,MAPK1IP1L,DUSP10,LRIG2,RNF38,MSN,XRCC6,NPTN,SEC31A,DNAJA2,DR1,WTAP,HIF1A,MAP2K1,HNRNPA1,TAP2,HNRNPM,COPS7B,PCNP,TOMM22,BTBD1,CSDE1,YWHAZ,CHEK2,RBBP4,HSP90B1,HNRNPH2,EIF3I,DAZAP2,ANP32A,EZR,GALNT12,NADSYN1,ADAM10,PDIA3,DPYSL2,ACTG1,KDELR2,G3BP2,PTP4A2,HNRNPD,CSNK1G3,MATR3,CORO1C,NAPG,HNRNPR,ODF2,MTHFD1,TXNIP,STX8,HSPA9,SLC35A2	1.71852	0.0010846	0.0434983
GCM_MAX	post2ndALVAC.24hours	-2.28095	0	0	RBM25,MTPN,CSDE1,COPS2,LARP7,PRPF40A,PCF11,LEMD3,HNRNPR,MYCBP2,CRBN	1.71652	0.00259067	0.0438831
DAZARD_RESPONSE_TO_UV_SCC_DN	post2ndALVAC.24hours	-2.27743	0	0	ISG20L2,SHOC2,PAPD7,HMGA2,KIF2A,N4BP1,AMD1,ARHGEF7,PUM1,TIPARP,POGZ,ZMYND8,CNOT2,MYC,KIFC1,SPOP,SIAH2,EXT1,ARL4C,ASAP2,CSTF1,MCL1,TGIF1,NOP16,ZNF146,RAPGEF2,SIAH1,MPHOSPH10,PHF3,DDX3Y,CASP8,CDYL,NUP153,NGDN,ADNP,CNOT4,TNFAIP8	1.70413	0.00112108	0.0469865
GSE13485_DAY1_VS_DAY7_YF17D_VACCINE_PBMC_DN	post2ndALVAC.24hours	-2.26745	0	2.48276e-05	MS4A4A,TMEM126B,IFIT1,OASL,SMC2,RBBP8,WARS,OAS2,FAM70A,IFIH1,TRIM69,IFI44L,ZWINT,TDRD7,C1GALT1C1,ANAPC10,HMOX1,MYOF,DDX60,STAT1,PLSCR1,NMI,USP18,OAS1,CHMP5,DHX58,SPATS2L,CMPK2,AIM2,DUSP6,MRPS28,SIGLEC1,GBP1,IRF7,POP4,BMP2K,IL1RN,ZNF684,TNFSF10,GCH1,PSME2,PLAC8,CASP7,TAP1,ZNF410,CSE1L,DTX3L,PSMA4,SERPING1,CAPZA1,PPP2R3C	2.019	0	0.00617913
GCM_DDX5	post2ndALVAC.24hours	-2.26525	0	4.88116e-05	RBM3,COL16A1,TCEA1,PSMD6,RAD21,MSN,SUMO2,SRP14,ARHGEF7,ATP5F1,HNRNPA1,HNRNPM,SET,YWHAZ,DHX9,HNRNPA2B1,YWHAQ,HNRNPD,TRA2B,NONO,EIF4G2,DDX5,SLC25A3,NUP153,HNRNPL,BCLAF1,SRSF4,RABGGTB	1.88146	0	0.0137594
GSE42724_NAIVE_BCELL_VS_PLASMABLAST_UP	post2ndALVAC.24hours	-2.26371	0	7.16844e-05	ITGB7,RTP1,MIA3,IFI44L,SLC25A28,DDX60,STAT1,PLSCR1,TRIM21,NMI,MASTL,USP18,OTOF,OAS1,DHX58,FAM46A,MAD2L1BP,SPATS2L,CMPK2,AIM2,CFB,MOV10,TAP2,SIGLEC1,GBP1,IRF7,HIST1H2AC,PATL1,TNFSF10,AXL,MCM5,GCH1,NLRC5,BTG3,NUB1,LAG3,FBXO32,TAP1,CASP12,PPM1K,DTX3L,SP140,PSMA4,SERPING1,B3GNT2,PSME1	1.86149	0	0.0159135
MORF_RAB11A	post2ndALVAC.24hours	-2.24162	0	0.000103165	STXBP3,IK,ILVBL,PRPSAP1,CFDP1,PSMA5,DPM1,PSMD10,SPCS2,PDCD10,GTF2H1,PPP2R5E,ZNF410,SDHC,TERF2IP,TPR	1.79733	0	0.0249755
MILI_PSEUDOPODIA_HAPTOTAXIS_UP	post2ndALVAC.24hours	-2.24205	0	0.000105007	OXR1,METAP2,SLU7,ARMCX3,CAPZA2,TOPORS,RANBP6,SACM1L,TCEA1,PIP4K2A,PSMD6,WDR43,KIF2A,BZW1,EIF5B,ABCB7,RBM25,VPS54,INTS6,SRSF1,RASA1,POLA1,CNOT2,BTBD1,SELT,VAMP7,CDK12,TBC1D15,HNRNPH2,UGP2,KIAA1524,SNX5,SOS1,ZNF24,COPS2,LARP7,DYNLT3,FXR1,PPFIA1,PDCD10,EIF3J,CCNC,SUMO1,TAX1BP1,PPP1R12A,UBE2V2,DNAJA1,CENPK,RPS6KA6,KIF5B,GPBP1	1.81774	0	0.0212591
GCM_DENR	post2ndALVAC.24hours	-2.23158	0	0.000112024	POLDIP3,PCNP,ACOT8,DDX17,MORF4L1,ALKBH5,DDX47,SPG21,S100PBP,GPBP1	1.75801	0.00132626	0.0360748
PUJANA_BRCA_CENTERED_NETWORK	post2ndALVAC.24hours	-2.23481	0	0.000117626	LBR,SMC2,RBBP8,TOPBP1,RAD54L,NDC80,ESPL1,PRKDC,SMC3,METAP1,RAD21,TTF2,STAT5A,SEC31A,ABCB7,RPA1,POLA1,TMPO,NASP,ZNF330,KIFC1,CCNA2,RAD51C,IDH3B,CHEK2,RBBP4,CSNK2A1,RB1,PPP2R5C,MCM5,RRM1,SNRPA1,EZH2,DUT,NAE1,POLR2B,BUB3,MYBL2,ASF1A,DNMT1,NCK1,XPO1,COPS3,PPP1CC	1.7591	0.00113636	0.0360505
DER_IFN_BETA_RESPONSE_UP	post2ndALVAC.24hours	-2.21864	0	0.000190821	IFI6,EPS15,IFITM1,CALD1,CSRP3,MAP1B,SSBP1,IFIT1,OASL,OAS2,MAP3K10,CTR9,EPRS,PTPN11,TRIM14,XRCC6,PARP1,STAT1,PLSCR1,TRIM21,NMI,OAS1,HIF1A,DDX1,PPP5C,GBP1,TEAD1,RBBP4,PSMB10,DDX17,CASP8,POLR2B,TAP1,ELF1,BCLAF1,PSME1	1.76439	0.00117096	0.0346759
MORF_SP3	post2ndALVAC.24hours	-2.2222	0	0.000196603	METAP1,RAD21,BZW1,UTP18,IK,SUMO2,MYL12B,RPA1,POGZ,SET,G3BP1,PRPSAP1,COPS5,HNRNPA2B1,ZNF146,TIAL1,DYNC1I2,YWHAQ,PSMB4,SPCS2,PHF3,DRG1,GTF2H1,G3BP2,SUMO1,MDH1,NONO,PPP2R5E	2.08138	0	0.00398875
GNF2_XRCC5	post2ndALVAC.24hours	-2.20768	0	0.000220302	PSMA3,RPA1,ATP5F1,SRSF1,XRCC5,POMP,ILF2,PSMA5,RTCD1,SRSF10,COPS2,HNRNPA2B1,PRPF40A,NAE1,SRP54,HNRNPC,SUMO1,BUB3,MMADHC,NONO,EIF4A1,UQCRC2,PSMA4,RAN,DHX15	1.81576	0.00121065	0.0214479
MORF_XRCC5	post2ndALVAC.24hours	-2.20157	0	0.000268991	CDC16,NSA2,TRRAP,PPIE,TREX2,XRCC6,PTBP1,STK24,DNAJC8,WDR1,MPHOSPH9,PDHB,EIF3M,SUMO2,SRP14,CAP1,SRSF1,XRCC5,ADD1,VDAC3,HNRNPM,MLEC,SET,ATP5O,VDAC2,IDH3B,ILF2,NAP1L4,EIF3I,ANP32A,RRM1,PDIA6,DHX9,HNRNPA2B1,TIAL1,PRPS2,YWHAQ,TUFM,PRPF40A,DUT,RUVBL2,BUB3,HNRNPD,MDH1,TRA2B,NONO,DNMT1,HNRNPAB,SLC25A3,XPO1,NARS,HNRNPR,PPP1CC,CAPZA1,H2AFZ	1.72145	0	0.0423879
GSE1432_CTRL_VS_IFNG_6H_MICROGLIA_DN	post2ndALVAC.24hours	-2.1944	0	0.000280957	IFI44L,RCN1,SLC25A28,TDRD7,STAP1,MYOF,KIF2A,DDX60,STAT1,PION,PLSCR1,P2RY14,AKAP12,NMI,PSMA3,VPS54,LCP2,ARAP2,CFB,STX11,POMP,GBP1,IRF7,POLG,CSF2RB,GNG10,BAZ1A,TNFSF10,SOCS1,SLAMF8,GCH1,JAK2,PSME2,SRP54,ASCC3,G3BP2,GBP2,CASP7,PDCD1LG2,TAP1,IDO1,DNAJA1,CTNS,SP140,PSMA4,SERPING1,HNRNPR,SAR1A,PSMA2	1.97648	0	0.00808329
GSE21360_NAIVE_VS_QUATERNARY_MEMORY_CD8_TCELL_UP	post2ndALVAC.24hours	-2.19649	0	0.000284342	LIAS,TOP1,GTF2B,TRAPPC4,PARP12,IMPAD1,ISG15,C1GALT1,IFI6,FCHSD2,LRIF1,IFITM1,RBM28,IFIT1,OASL,DCTN4,DCP1A,OAS2,ISG20,WDR44,IFIH1,INTS12,ISG20L2,MGAM,IFI44L,TDRD7,CD48,STAP1,DOPEY1,DTWD1,DDX60,N4BP1,PCID2,PLSCR1,TRIM21,NMI,USP18,OAS1,CHMP5,FAM46A,FBXO28,NCOA3,RCL1,IRF7,MPP6,STAMBP,NCAM2,CMAS,SAR1B,IPO8,RBM22,TADA2A,PIGK,RNF146,ELF1,UTP14C,EIF4A1,GLS,USP16,SP140,B3GNT2,HERC4,RAP1B	1.95738	0	0.0072375
HALLMARK_INTERFERON_ALPHA_RESPONSE	post2ndALVAC.24hours	-2.17897	0	0.000415857	OASL,WARS,CSF1,ISG20,IFIH1,IFI44L,SLC25A28,TDRD7,TRIM14,DDX60,IL7,PLSCR1,TRIM21,NMI,USP18,PSMA3,OAS1,DHX58,FAM46A,CMPK2,MOV10,IRF7,LPAR6,RIPK2,PSME2,NUB1,CASP8,GBP2,TAP1,ELF1,PSME1,TXNIP	2.00139	0	0.00612235
GSE42021_CD24HI_VS_CD24INT_TREG_THYMUS_DN	post2ndALVAC.24hours	-2.16971	0	0.000439175	ISG15,RNF19B,CTNNBL1,IFI6,STAT3,UBA7,IFITM1,TGM2,IFIT1,OASL,IL6ST,WARS,OAS2,ISG20,IFIH1,GTPBP1,IFI44L,SLC25A28,TDRD7,TAPBP,DOPEY1,TRIM14,DDX60,STAT1,PLSCR1,NFKBIA,TRIM21,NMI,USP15,USP18,OAS1,SPATS2L,CBR3,CFB,TAP2,GBP1,IRF7,ITM2B,TNFSF10,ST8SIA4,EXT1,MCL1,PSMA6,PSMB10,PSME2,CASP8,CASP7,TAP1,IDO1,ZNF22,USO1,PSMA4,TFG,SERPING1,PSME1	1.95757	0	0.00747875
GSE17974_1H_VS_72H_UNTREATED_IN_VITRO_CD4_TCELL_DN	post2ndALVAC.24hours	-2.1673	0	0.000446896	METAP1,SORD,FBXO22,APAF1,KIF2A,PIAS3,NCAPD3,EED,AP3B1,MPHOSPH9,CETN3,GLE1,NUP37,EDC3,SPATS2L,SASH3,MAP2K1,VDAC3,CPSF3,MAD2L2,CENPM,ETFA,RBBP7,CCNA2,KTN1,UGP2,DTD1,MCM5,TFB1M,STC2,VDAC1,HNRNPUL2,YWHAQ,DUT,FANCA,DRG1,SIRT5,CCT8,STARD3NL,CLNS1A,USO1,COMMD8,RAN	1.74044	0.00109529	0.0381451
GSE7548_NAIVE_VS_DAY7_PCC_IMMUNIZATION_CD4_TCELL_DN	post2ndALVAC.24hours	-2.15779	0	0.000486439	CD2AP,PCMT1,TESK1,TMEM87A,CD97,TOP1,GTF2B,PML,CASP10,ELF4,TIA1,ISG15,RNF19B,UBA7,IFITM1,SPTA1,ST3GAL5,IFIT1,OASL,WARS,EXT2,OAS2,ISG20,MDK,SFT2D2,STK17B,BARD1,SHOC2,IFI44L,TDRD7,PAPD7,N4BP1,PLSCR1,P2RY14,TRIM21,NMI,GART,PSMA3,OAS1,RP2,GBP1,SETX,IRF7,NASP,MYL12A,CLDND1,CSF2RB,BAZ1A,SOCS1,HIVEP2,BIRC2,CKS1B,GCH1,RAPGEF2,LAG3,RBM4,ADM,CASP7,TRPC4AP,TAP1,IDO1,DNAJA1,NUP153,DHX15,SRSF4,PSMA2,TERF2IP	1.84156	0.00110132	0.0183148
GNF2_KPNB1	post2ndALVAC.24hours	-2.15097	0	0.000560828	KIAA0020,NOL11,PSMA1,USP1,EIF3D,SSBP1,MAP3K4,TOPBP1,PRPF31,SMC3,HNRNPK,SYNCRIP,SMARCA5,EED,SRSF1,XRCC5,HNRNPM,SRSF10,COPS2,PRPF40A,NAE1,SRP54,DDX47,CNOT7,BUB3,SRSF7,CEP57,UQCRC2,NUP153,HNRNPR,DHX15,TPR	1.91866	0	0.0101455
GSE1460_CD4_THYMOCYTE_VS_NAIVE_CD4_TCELL_CORD_BLOOD_UP	post2ndALVAC.24hours	-2.13952	0	0.000687691	TMEM50A,PSMD6,RBM12,CMTM6,CEP170,USP39,IARS2,WDR1,ITM2A,CALU,PCCB,NUP107,ELK3,UBE2E3,GLMN,CUL1,DHRS3,CD200,HNRNPA1,DUSP6,DDX1,DCLRE1A,BTBD1,GORASP2,NME7,RIOK2,MAP2K6,VDAC1,DYNC1I2,SMYD3,GTF3C3,YWHAQ,PDE4D,SF3B1,ACTG1,PIK3R4,G3BP2,PTP4A2,HNRNPD,MDH1,ALG8,TM9SF3,ADH5,UQCRC2,SLC25A3,CORO1C,RAP1GDS1	1.73916	0	0.0382376
GCM_CHUK	post2ndALVAC.24hours	-2.13174	0	0.000729668	RBM25,POLDIP3,TMEM55B,PCNP,STAMBP,MTPN,ACOT8,MORF4L1,ALKBH5,PCF11,DDX47,TSNAX,ZNF274,LEMD3,GPBP1	1.86197	0	0.0160142
GSE7831_UNSTIM_VS_CPG_STIM_PDC_4H_UP	post2ndALVAC.24hours	-2.13319	0	0.000732147	CXXC1,CXCR5,CDK2AP1,ATG16L1,RNF145,SPTBN1,RCN1,UBA2,CITED2,WDR43,ENO1,TMEM5,NME1,ARTN,CHMP5,SMPDL3A,IDE,DHRS3,XRCC5,CFB,DDX1,FAM105A,RACGAP1,MAPK6,KLHDC2,ARNTL,ARHGEF1,YWHAZ,ANXA2,CHCHD3,PAFAH1B1,IPO8,LRMP,JAK1,DHX9,EZH2,NFKB1,ACTG1,KDELR2,PRKCH,SPG21,ORC5,PLRG1,ACSS1,ID2,MLLT1,RAN,RAP1GDS1,HERC4,ZFAND5,H2AFZ	1.82989	0	0.0190481
ENK_UV_RESPONSE_KERATINOCYTE_DN	post2ndALVAC.24hours	-2.13583	0	0.000737788	BCL6,GRSF1,HNRPDL,ZNF148,ENTPD4,CNN3,DSCR3,DKC1,TARBP1,VRK1,LBR,RBBP8,RARS,FEN1,FH,COL16A1,STT3A,PFKM,PAPD7,UBA2,PARP1,IMPA1,NPEPPS,GBE1,MRPL3,ARFGEF1,GOLGA4,STXBP3,TRIM23,AKAP11,SRSF1,NCOA3,RP2,KTN1,TOP2B,RB1,RTCD1,RRM1,COPS2,ZNF146,STX7,MYO10,ME2,ACTL6A,YTHDC1,PTPN1,PCF11,G3BP2,POLR2B,BUB3,MDH1,HNRNPR,TPR	1.82918	0	0.0190559
PUJANA_XPRSS_INT_NETWORK	post2ndALVAC.24hours	-2.135	0	0.000753065	LBR,SMC2,RBBP8,TOPBP1,RAD54L,NDC80,ESPL1,AURKB,RHOH,PRKDC,SMC3,ACYP1,ZWINT,METAP1,KIAA0101,RAD21,TTF2,STAT5A,SEC31A,MPHOSPH9,ABCB7,RPA1,POLA1,TMPO,NASP,ZNF330,KIFC1,CCNA2,RAD51C,IDH3B,CHEK2,RBBP4,CSNK2A1,RB1,PPP2R5C,MCM5,SRSF10,RRM1,LARP7,SNRPA1,EZH2,DUT,PLK4,NAE1,POLR2B,BUB3,MYBL2,ILF3,ASF1A,DNMT1,NCK1,CEP57,XPO1,COPS3,PPP1CC	1.7469	0	0.0367696
GNF2_PTPRC	post2ndALVAC.24hours	-2.09415	0	0.00106405	RNF44,CD97,BIN2,BTN3A3,PARP12,MSL1,PTPN6,SNRK,GPR65,OSTF1,FYB,CORO1A,RAC2,STK38,CD48,TRAF3IP3,PION,WIPF1,SIPA1,TSC22D3,LCP2,PARP8,GRK6,JAK1,CASP8,DDX5,SEMA4D,RAP1B,TXNIP	2.03821	0	0.00485931
GSE13485_DAY1_VS_DAY21_YF17D_VACCINE_PBMC_DN	post2ndALVAC.24hours	-2.09683	0	0.00107007	P2RY14,PDHB,CETN3,SUMO2,FAM3C,POT1,REXO2,STYX,LXN,NME7,GLRX,ZNF684,RAD51C,CHEK2,COPS5,KBTBD3,PSMA5,SGOL2,EEF1E1,ALG6,MAT2B,GTF2H1,EIF3J,GIN1,RAD50,MDH1,TSNAX,CACYBP,ALG8,CLNS1A,UBE2V2,ADH5,METTL5,COMMD8,HSPE1,EXOSC3,PPP2R3C,HSPA8,COPS4	1.8736	0	0.0143303
MORF_GNB1	post2ndALVAC.24hours	-2.09112	0	0.00112408	DGUOK,ASXL1,ERP29,EPRS,ESPL1,FH,PRPF31,SDHB,TRIM28,TCEA1,CDC16,UBA2,TREX2,PTBP1,STK24,DNAJC8,MPHOSPH9,PDHB,EIF3M,SUMO2,SRP14,CAP1,XRCC5,ADD1,VDAC3,HNRNPM,MLEC,SET,ATP5O,VDAC2,PGK1,KIFC1,CCNI,ILF2,RBBP4,EIF3I,ANP32A,RRM1,PDIA6,VDAC1,HNRNPA2B1,TIAL1,YWHAQ,HCCS,TUFM,EI24,PRPF40A,GOT2,RUVBL2,PTP4A2,TAX1BP1,BUB3,HNRNPD,MDH1,TRA2B,NONO,ILF3,HNRNPAB,SLC25A3,XPO1,HNRNPR,PPP1CC,CAPZA1,H2AFZ	1.71116	0	0.0456014
GSE37533_PPARG2_FOXP3_VS_FOXP3_TRANSDUCED_CD4_TCELL_DN	post2ndALVAC.24hours	-2.08929	0	0.00116516	GTF2B,PML,CASP10,PARP12,ELF4,ISG15,RNF19B,CTNNBL1,IFI6,UBA7,NF1,IFIT1,OASL,WARS,OAS2,PCNX,KCNJ12,CSF1,ISG20,IFIH1,IFI44L,SLC25A28,TDRD7,TRIM14,TTC39A,DDX60,IL7,N4BP1,STAT1,PIGL,PLSCR1,TRIM21,NMI,USP18,OAS1,DHX58,FAM46A,SPATS2L,CBR3,TAP2,GBP1,SETX,IRF7,MAK,SIAH2,GCH1,MCL1,JAK2,RIPK2,PSMA6,PSMB10,PCF11,CASP7,SIDT2,TAP1,MEF2C,ACOT9,ELF1,IDO1,DNAJA1,PSME1	2.00211	0	0.00636325
JOHNSTONE_PARVB_TARGETS_3_DN	post2ndALVAC.24hours	-2.08536	0	0.00119678	PITHD1,BEND6,NUDCD2,MNAT1,SMC3,BARD1,PDS5B,POLE4,RBM12,CNIH,MPHOSPH6,PLSCR1,EIF5B,RAPGEF6,MPHOSPH9,SNRPN,DR1,WTAP,RPA1,DHX29,ODC1,ZNF451,KLHL23,CENPN,MTERFD1,BRD2,CDCA7L,CKS1B,BCAT1,ATXN1L,RBM15,MARCH1,NUB1,MED27,ARGLU1,RSRC1,MUDENG,EBNA1BP2,CCND3,SUDS3,ZNF274,UQCRC2,SRSF4,SAR1A	1.77144	0	0.033416
GSE23502_BM_VS_COLON_TUMOR_MYELOID_DERIVED_SUPPRESSOR_CELL_DN	post2ndALVAC.24hours	-2.0856	0	0.00120471	FYN,ARID1B,FH,TNKS,SPIC,IGJ,SNX13,CDK5R1,RNF145,ZNF207,PDS5B,ARMC9,KIAA0101,ECT2,ENTPD5,AKAP12,TRIM21,ELK3,CDCA2,ZRANB2,SRSF1,SESN1,CD200,DUSP6,MAP7,CCNT2,HHEX,TSPAN8,TMPO,HPS3,SEMA4B,BMP2K,LPAR6,KLRD1,UGP2,BTLA,ST8SIA4,VPREB3,DDX17,DDX3Y,GPR174,SLC16A4,EVI2B,TAX1BP1,CHTOP,CENPK,HERC4,PAG1,TXNIP,DOCK10	1.83293	0	0.0187227
GSE25146_UNSTIM_VS_HELIOBACTER_PYLORI_LPS_STIM_AGS_CELL_DN	post2ndALVAC.24hours	-2.08158	0	0.00127139	PRMT7,IGJ,CXCR5,FBXL20,RANBP6,SHOC2,EEA1,SETBP1,STAT1,CCNL2,CCL3,MTA3,PPCDC,RASA1,IDE,GBP6,DUSP6,CCNT2,MYC,SAMD3,PRKRIR,KTN1,RPS6KB1,STK39,TTC14,ERBB2IP,MED8,EXOC1,COG3,JAK1,NLRC5,PDE4D,MPHOSPH10,DDX17,SRSF7,DDX5,ZC3H7A,VWA5A,BCLAF1,HNRNPR,MYCBP2,DOCK10,TPR	1.93992	0	0.00854485
MORF_SNRP70	post2ndALVAC.24hours	-2.07929	0	0.00129772	HNRNPK,PPIE,PTBP1,DNAJC8,WDR1,ZNF337,SUMO2,SRP14,XRCC5,ADD1,ARPC2,CSK,DDX17,PTP4A2,HNRNPD,EIF4G2,CAPZA1,EIF4A2,RABGGTB	1.87932	0	0.0141046
GCM_TINF2	post2ndALVAC.24hours	-2.07749	0	0.00131786	DHX29,PRDM4,MORF4L1,RMND5B,DDX47,ZNF274,S100PBP,TTC17	1.83609	0.00136426	0.0187387
GSE42021_CD24HI_VS_CD24LOW_TCONV_THYMUS_DN	post2ndALVAC.24hours	-2.06673	0	0.0014049	IFI44L,SLC25A28,DOPEY1,AK2,HK1,KIF2A,PION,NUP107,TRIM21,NMI,USP15,ERLIN1,SPATS2L,HIF1A,CFB,TAP2,GBP1,LXN,ITM2B,PLEKHF2,CD40,GLRX,TNFSF10,SOCS1,ST8SIA4,MCL1,JAK2,PSMA6,PSMB10,GBP2,CASP7,NECAP1,TAP1,IDO1,ZNF22,ACSL3,USO1,PSMA4,TFG,SERPING1,PSME1	2.02988	0	0.00531443
GSE6092_IFNG_VS_IFNG_AND_B_BURGDORFERI_INF_ENDOTHELIAL_CELL_DN	post2ndALVAC.24hours	-2.06278	0	0.00148568	PLA2G16,IKZF1,ST3GAL3,STAP1,PAPD7,TAGAP,BATF,AP3B1,AMD1,MOB3C,USP18,WTAP,MAP2K1,RCL1,CMPK2,LCP2,STX11,LRRC8C,CLIC5,TMEM176B,TANK,GLRX,CSDE1,CP,SIAH2,TNFSF10,FGL2,RAPGEF2,RIPK2,SETDB2,PSMA6,PSME2,ADM,LTV1,TRA2B,NCK1,PSME1,ANKIB1,ZFAND5,SAR1A,GPBP1,RILPL2	1.73274	0	0.0400902
GCM_TPR	post2ndALVAC.24hours	-2.06188	0	0.0014904	IARS,DHX9,PCM1,POLR2B,TRA2B,PPP1CC,TPR	1.82166	0	0.0204056
GO_DNA_DEPENDENT_ATPASE_ACTIVITY	post2ndALVAC.24hours	-2.05263	0	0.00164919	RAD17,MNAT1,SMARCA4,TTF2,XRCC6,ERCC6,CDK7,MCM7,XRCC5,G3BP1,GTF2H2,RAD51C,TOP2B,RBBP4,ANXA1,ERCC3,POLQ,DHX9,ASCC3,GTF2H1,ATRX,RUVBL2,RAD50,SMARCAL1	1.94657	0	0.00765362
GSE6269_FLU_VS_STREP_PNEUMO_INF_PBMC_UP	post2ndALVAC.24hours	-2.04818	0	0.00175	PML,TRAPPC4,HMGXB3,PARP12,PARP2,MARK2,MLL,ISG15,C2CD3,USP1,IFI6,NFATC2IP,IFITM1,AASDHPPT,NF1,ST3GAL5,DCAF15,IFIT1,OASL,OAS2,FAM70A,SMG7,IFIH1,PPIG,IFI44L,SMARCA4,TRIM14,DDX60,SYNCRIP,N4BP1,STAT1,EIF5B,CKS2,NMI,GART,USP18,OTOF,OAS1,CHMP5,RBM25,PRR5,DHX29,SPATS2L,NCOA3,GPATCH8,MLEC,SIGLEC1,GBP1,SETX,IRF7,BRD2,RAD51C,GCH1,PRPF40A,PSME2,CEP290,TNIK,ILF3,PDHX,SERPING1,SON,IDH2,PTPLAD1	1.79255	0	0.0261711
GCM_MLL	post2ndALVAC.24hours	-2.04763	0	0.0017705	LUC7L3,MAEA,RBM25,POGZ,PATL1,MTPN,PRDM4,TTC14,HNRNPH3,TRAPPC6B,DYNC1I2,SLC41A3,MORF4L1,PCF11,KDM3B,DDX47,CHTOP,ZNF512,ZNF274,LEMD3,HNRNPR,ZFAND5,RNF8,TTC17,GPBP1	1.86019	0	0.0158655
HAMAI_APOPTOSIS_VIA_TRAIL_UP	post2ndALVAC.24hours	-2.04657	0	0.00177341	VRK1,EMP1,RBBP8,CHD1,PPARGC1A,EPRS,REV3L,DNAJA4,DIAPH3,SLU7,ARMCX3,PIK3CA,SNX13,SMC3,DNAJC3,EEA1,NUCB2,RAD21,RPAP3,DEPDC1,NIN,ETAA1,RAPGEF6,LUC7L3,PSMD12,NMI,RSF1,EPB41L3,CETN3,CAST,ADD3,ZBTB11,FAP,MMD,WDR11,SETX,RIOK2,KTN1,BAZ1A,MYO9A,BIRC2,FPGT,PCCA,BCCIP,PDCD10,PCM1,MRPS31,CEP57,ITPR1,USO1,PSMA4,XPO1,DOCK10	1.70981	0	0.0459648
GSE9960_HEALTHY_VS_GRAM_NEG_SEPSIS_PBMC_DN	post2ndALVAC.24hours	-2.04703	0	0.00177622	SPRED2,OSM,BHLHE22,ISG20,IFIH1,LRP8,CD44,WBP4,EYA3,IL7,GABRB2,N4BP1,CMTM6,BATF,NFKBIA,WTAP,PSMA3,CHMP5,LONRF1,CLIC4,SMURF2,AKR1B1,IRF7,MAD2L2,POP4,CLDND1,CSF2RB,TANK,RAB30,CSNK2A1,CYP27B1,UGP2,GPR84,MCM5,ATP6V1H,GCH1,SNX10,BTG3,RAPGEF2,PSME2,EZH2,NFKB1,ADM,TSPAN3,ACOT9,ELL2,PSME1,SEMA4D,RAP1B,PSMA2,TNFAIP8	1.92887	0	0.0092957
SCHLOSSER_SERUM_RESPONSE_DN	post2ndALVAC.24hours	-2.03311	0	0.00204577	UBA3,SNRPB2,R3HDM1,EDIL3,CPNE3,RAD17,MNAT1,IGJ,FBLN1,PRDX3,SACM1L,TCEA1,DUSP11,PSMD6,SMARCA5,ZFYVE16,STAT1,KIFAP3,WDR7,OAS1,PEX2,RP2,NEK7,GLRX,NCOA2,TOP2B,COPS5,PAFAH1B1,ANP32A,DHX9,DYNLT3,TCAP,PDCD10,SLC25A5,DDX5,PSMA4,RAP1B,PPP1R8,RCN2	1.83097	0	0.0190321
SCHLOSSER_MYC_TARGETS_REPRESSED_BY_SERUM	post2ndALVAC.24hours	-2.02613	0	0.00217619	EPRS,NUP93,FH,API5,PGAM1,COX11,BTF3,OTUD4,DEAF1,UBA2,TFAM,OAT,PWP1,IARS2,MRPL3,SRSF1,ZBTB11,HNRNPA1,DDX1,TMX1,ZNF330,IARS,PDIA6,DHX9,NOP16,COPS2,EEF1E1,TIAL1,EI24,ACTL6A,PMPCB,PRMT3,NAE1,G3BP2,KPNA2,BUB3,NUP210,CCT8,ALG8,NUP153,NGDN,HSPE1,RAN,FBXO21,RABGGTB	1.82479	0	0.0196629
DEBIASI_APOPTOSIS_BY_REOVIRUS_INFECTION_UP	post2ndALVAC.24hours	-2.02531	0	0.0022032	PIR,ZNF391,PPM1A,ISG15,SNRK,PCK1,BCL6,UBE2D1,NF1,UGCG,CTGF,IFIT1,OASL,OAS2,NR3C1,TAC1,TAF1A,ISG20,PGAM1,NRAS,OTUD4,IFI44L,ZWINT,AK2,EIF2B5,DCTN6,N4BP1,CREBZF,STAT1,PLSCR1,NFKBIA,WTAP,OAS1,FBXO28,TIPARP,BHLHE40,H1F0,GBP1,NEK7,PRKRIR,ZEB2,TADA2A,MCL1,ZNF24,DHX9,TIAL1,ZNF518A,BTG3,FXR1,PDE4D,PLK4,NECAP1,RPE,BUB3,TAP1	1.97427	0	0.00774048
WATANABE_RECTAL_CANCER_RADIOTHERAPY_RESPONSIVE_UP	post2ndALVAC.24hours	-2.02408	0	0.00222915	GAS6,DDX27,COASY,ABCD3,CD44,MRFAP1L1,KIAA0182,DNAJC7,ATP1A1,SURF1,TMEM115,SLC35D1,WDR1,GOLGA4,PDHB,XRCC5,AHCYL1,ARF4,VAMP7,RRM1,NFKB1,DRG1,PRKAG1,DHX15,TRIM33,SON,TERF2IP,TPR	1.85852	0	0.0159272
GSE13485_CTRL_VS_DAY7_YF17D_VACCINE_PBMC_DN	post2ndALVAC.24hours	-2.0222	0	0.00225633	IFITM1,TCF7L2,CX3CR1,MS4A4A,IFIT1,OASL,RBBP8,OAS2,FAM70A,IFIH1,MSR1,UTRN,TRIM69,IFI44L,TDRD7,C1GALT1C1,TRIM14,MYOF,DDX60,NLRP3,LRRCC1,STAT1,PLXNC1,PLSCR1,NMI,USP18,OTOF,OAS1,CHMP5,DHX58,TCN2,SPATS2L,CMPK2,LCP2,AIM2,SIGLEC1,GBP1,IRF7,TTC21A,PRPSAP1,IL1RN,TNFSF10,AXL,GCH1,ATP13A1,MYO10,ANKRD22,JAK2,PSME2,PLAC8,TAP1,ACOT9,CYSLTR1,DTX3L,PSMA4,SERPING1	1.90854	0	0.0102994
GSE22601_DOUBLE_NEGATIVE_VS_CD4_SINGLE_POSITIVE_THYMOCYTE_DN	post2ndALVAC.24hours	-2.0194	0	0.00234144	PSMC5,PSMD6,DPY19L3,CCNL2,EED,SQLE,P2RY14,FTSJ1,CIRH1A,PRDM1,PSMA3,NUS1,VPS54,DHX29,TIMM8B,IDE,FAM188A,TIPARP,HIF1A,NKG7,MYC,CLDND1,CYB5A,SECISBP2,RPS6KB1,BAZ1A,SOCS1,MCTP2,YWHAH,ATP6V1H,MCL1,PDIA6,AFP,TBRG4,EI24,BCCIP,PTPN1,KPNA2,HSPH1,PPP1R12A,DNAJA1,VWA5A,XPO1,DNAJB11,GNPDA2	1.82362	0	0.0199395
GSE42021_TCONV_PLN_VS_CD24HI_TCONV_THYMUS_UP	post2ndALVAC.24hours	-2.00912	0	0.00262627	DNAJC7,SLC25A28,DUSP10,ZNF7,ITGB6,AK2,KIF2A,PION,NMI,EIF3M,ERLIN1,PSMA3,FADS3,TAP2,GBP1,LXN,ITM2B,PLEKHF2,CD40,SOCS1,ST8SIA4,SOS1,MCL1,ARID5B,JAK2,PSMA6,PSMB10,PSME2,ZNF277,ASCC3,PCM1,CASP8,GBP2,CASP7,TAP1,IDO1,ZNF22,ACSL3,USO1,PSMA4,PSME1	1.92347	0	0.0097597
GSE13485_CTRL_VS_DAY3_YF17D_VACCINE_PBMC_DN	post2ndALVAC.24hours	-2.00879	0	0.00263458	IFITM1,TCF7L2,CX3CR1,MINA,ST3GAL5,TXLNA,GNS,MS4A4A,IFIT1,OASL,OAS2,IFIH1,ZDHHC16,NYNRIN,TRIM69,IFI44L,TRIM14,MYOF,DDX60,STAT1,PLXNC1,PLSCR1,USP18,OAS1,DHX58,SPATS2L,CMPK2,LCP2,AIM2,MOV10,SIGLEC1,GBP1,IRF7,TBCE,VPS45,CSK,GCH1,MARCH1,ANKRD22,PCCA,PSME2,PLAC8,GTF2H1,RAD50,RPE,SIDT2,TAP1,CYSLTR1,DTX3L,SERPING1,MTHFD1,SMARCAL1	1.70959	0	0.0459187
GSE39152_BRAIN_VS_SPLEEN_CD103_NEG_MEMORY_CD8_TCELL_UP	post2ndALVAC.24hours	-2.00411	0	0.0027309	EMP1,IKBKG,RARS,FYN,CSF1,ZNF281,RAD17,RBM3,PDK3,DSTN,NRAS,OTUD4,SLC25A28,EEA1,PSMD6,ZNF639,STAT1,UBL3,PLSCR1,NVL,ANKRD17,HSP90AB1,DNAJA2,PDHB,CD83,ANKRD13C,USP18,OAS1,CLIC4,ODC1,MDM2,HNRNPA1,ARPC2,LYRM2,ATP6AP2,FARS2,TANK,GCH1,SNX10,BTG3,JAK2,PSMB4,BRIX1,HIVEP1,ACTG1,DRG1,TAP1,NONO,CHTOP,TSNAX,KALRN,USO1,RAP1GDS1,M6PR	1.76512	0	0.0345248
GENTILE_UV_RESPONSE_CLUSTER_D4	post2ndALVAC.24hours	-2.002	0	0.00281191	PUM1,SMURF2,POGZ,BHLHE40,MAPK6,PPP2R5C,ARID5B,EEF1E1,RAPGEF2,SIAH1,SNRNP40,DDX17,PDCD10,KPNA2,XPO1	1.78856	0.00124688	0.0274865
GSE42021_TREG_PLN_VS_CD24INT_TREG_THYMUS_DN	post2ndALVAC.24hours	-2.00048	0	0.00283107	IFIT1,OASL,WARS,RARS,OAS2,PELO,ISG20,IFIH1,IFI44L,SLC25A28,TAPBP,ZNF7,TRIM14,DDX60,SMARCA5,STAT1,PLSCR1,TRIM21,NMI,EIF3M,ERLIN1,PSMA3,OAS1,SPATS2L,CFB,TAP2,GBP1,LXN,ITM2B,ST8SIA4,GCH1,MCL1,RIPK2,UBE2D3,ERAP2,PSMA6,PSMB10,PSME2,ZNF277,PCM1,CASP8,GBP2,CASP7,TAP1,IDO1,ZNF22,USO1,PSMA4,PSME1	1.82539	0	0.019652
GNF2_HAT1	post2ndALVAC.24hours	-1.99698	0	0.00288234	SMC4,ANP32B,SERBP1,PA2G4,SNRPG,USP1,NUP50,VRK1,FEN1,NDC80,METAP2,SMC3,PSMD6,RAD21,MCM3,RPA1,SRSF1,ETFA,CHCHD3,MCM5,RRM1,METTL5,NUP153,COPS3,DHX15	1.83962	0	0.0184183
GCM_CSNK1A1	post2ndALVAC.24hours	-1.99179	0	0.00305317	ANKRD17,RBM25,POLDIP3,PCNP,TBC1D15,SEC22C,EHBP1,DMTF1,EIF3J,CHTOP,DHX15	1.75722	0.00393701	0.0358317
GO_CENTRIOLE	post2ndALVAC.24hours	-1.98701	0	0.00315539	CEP170,LRRCC1,SCLT1,MPHOSPH9,CETN3,CEP55,RP2,CENPJ,CEP192,CEP164,NEDD1,SDCCAG8,CEP250,DZIP1,PLK4,PCM1,CEP290,ROCK1,RAN,ODF2	1.84752	0	0.0175976
GSE22886_CTRL_VS_LPS_24H_DC_DN	post2ndALVAC.24hours	-1.98672	0	0.00316084	IFIT1,OASL,WARS,CXCR4,OAS2,SPRED2,CSRP2,ISG20,IFIH1,GTPBP1,IFI44L,DDX60,STAT1,IMPA1,TBC1D9,NMI,CD83,USP18,CHMP5,DHX58,CFB,TRIP4,GBP1,CRLF3,IRF7,HIST1H2AC,CLDND1,TNFSF10,HIVEP2,GCH1,TGIF1,COPS2,BTG3,RIPK2,SAMSN1,PSMB10,PSME2,NFKB1,CASP7,TAP1,IDO1,DNAJA1,PLAGL1,EZH1,TNFAIP8	1.76054	0	0.0354476
BROWNE_INTERFERON_RESPONSIVE_GENES	post2ndALVAC.24hours	-1.98258	0	0.00326663	OASL,WARS,OAS2,ISG20,IFI44L,TDRD7,TRIM14,STAT1,PLSCR1,TRIM21,NMI,OAS1,STX11,GBP1,IRF7,BAZ1A,TNFSF10,GCH1,GBP2,TAP1,IDO1	2.04546	0	0.00526832
GO_TRANS_GOLGI_NETWORK_MEMBRANE	post2ndALVAC.24hours	-1.97678	0	0.00337586	AP4B1,CLIP3,VPS54,COG1,AP1G1,ATP7B,RGP1,STX10,COG3,MARCH1,COG5,M6PR,GNAS	1.76885	0.00123001	0.0342952
GSE42021_TREG_VS_TCONV_PLN_UP	post2ndALVAC.24hours	-1.97839	0	0.00338813	TOP1,GTF2B,PML,BTN3A3,PARP12,ISG15,RNF19B,STAT3,IFITM1,UBE2D1,IFIT1,OASL,WARS,DCP1A,OAS2,CSF1,ISG20,IFIH1,GTPBP1,IFI44L,SLC25A28,TDRD7,TAPBP,TRIM14,HK1,DDX60,STAT1,PLSCR1,TRIM21,NMI,USP15,USP18,OAS1,SPATS2L,CBR3,CFB,GBP1,IRF7,TNFSF10,SOCS1,GALNT12,JAK2,PSMB10,PSME2,ZNF277,GBP2,CASP7,TAP1,ZNF410,IDO1,PSMA4,SERPING1	1.90453	0	0.0108197
DACOSTA_UV_RESPONSE_VIA_ERCC3_COMMON_DN	post2ndALVAC.24hours	-1.97514	0	0.0034197	MARK3,EPS15,IL7R,ZMYM4,ATR,KRIT1,TRIO,THBS2,FGF5,NR3C1,TOPBP1,FYN,CHD1,NDC80,ATP2B1,PPM1B,TIAM1,BARD1,MDN1,MTX2,WDR43,KIF2A,CEP170,NPEPPS,ARFGEF1,UTP18,WDR7,ZMYND11,CASK,AKAP9,USP24,RASA1,NCOA3,TIPARP,TRIM37,CNOT2,MYC,MAPK6,SETD2,FARS2,NEK7,STK39,NCOA2,HIVEP2,SOS1,ASAP2,CEP350,MICAL3,MYO10,ZC3H4,ATRX,SRSF7,ACSL3,DHX15,TRIM33,CNOT4	1.76405	0	0.03466
GSE16451_CTRL_VS_WEST_EQUINE_ENC_VIRUS_IMMATURE_NEURON_CELL_LINE_UP	post2ndALVAC.24hours	-1.97551	0	0.00343762	TTC13,OSTF1,LEF1,CTAGE5,RGMB,DAAM1,RARS,EMG1,KLHDC1,MKS1,MACROD1,NTRK3,SLC30A5,IKZF1,PIP4K2A,DOPEY1,PDE5A,CDH13,CACNB1,ACSS2,GGT1,PCCB,MPHOSPH9,CIRH1A,CMC1,UCHL3,SMURF2,MPP6,STT3B,MFHAS1,CEP164,KLRD1,TMEM41A,EIF3I,ARL4C,ATP6V1H,UTP14A,EIF2B3,MYO10,PCCA,DZIP1,PRMT3,GNG8,MBOAT4,ITPR1,COMMD8,PAG1	1.76067	0	0.0356067
GSE37532_TREG_VS_TCONV_CD4_TCELL_FROM_VISCERAL_ADIPOSE_TISSUE_DN	post2ndALVAC.24hours	-1.9706	0	0.00366815	PSMC4,ALG5,INTS12,POLE4,NES,TFAM,SPTY2D1,AK2,LIG1,MRPL32,NEK9,EIF2A,ATP5F1,NUP37,MDM2,IKZF5,TMPO,ARF4,TMEM183A,PLEKHF2,BTBD1,SEP15,PRKRIR,CCNI,NUP205,RRM1,UTP14A,COPS2,OLFM4,RIOK1,SPCS2,EIF3J,SUMO1,NONO,ILF3,CDC42,CTNS,GOSR2,GNPDA2	1.72315	0	0.0420961
GSE9601_UNTREATED_VS_NFKB_INHIBITOR_TREATED_HCMV_INF_MONOCYTE_DN	post2ndALVAC.24hours	-1.96939	0	0.00369331	LMBRD1,CTNND1,TTC3,GFRA1,NF1,ZMYM4,MAP3K4,IL6ST,JARID2,SPRED2,IKZF3,PRMT7,CHD7,RNF145,FBXL20,DUSP10,IKZF1,DCTN6,NDFIP1,LRRCC1,KIFAP3,GBE1,ITM2A,AKAP9,PEX2,XRCC5,WDR11,HIVEP2,ST7L,CHCHD3,BTLA,UTP14A,MICAL3,DYNC1I2,RAPGEF2,JAK2,BBS9,PCCA,EI24,YTHDC1,MAT2B,FBXO32,FUT10,PGAM2,ARHGEF3,CRBN,CD81,ZMYM2,ITGB1	1.81021	0	0.0225123
GSE18281_CORTEX_VS_MEDULLA_THYMUS_UP	post2ndALVAC.24hours	-1.96836	0	0.00371819	EFHA1,CALCR,SDCCAG3,UCKL1,IWS1,ERP29,R3HDM1,EWSR1,FAM70A,KRBA2,EXOSC7,ARMCX3,GIT2,TIAM1,HSPA12B,PSMD6,MSH6,ZCCHC11,CNIH,UBL3,CUL1,MAP2K1,HNRNPM,NEK7,KLRD1,RPS6KB1,IPO8,DYNLT3,DNAJB6,DDX17,PTPN1,GCDH,SLC15A4,TP53BP1,TRA2B,SRSF4,PPP1CC,ZFAND5,EXOSC3,RBM26,RABGGTB,FGF14	1.74996	0	0.0361474
DACOSTA_UV_RESPONSE_VIA_ERCC3_DN	post2ndALVAC.24hours	-1.96673	0	0.00376621	SGMS1,TRIM24,CUL2,MAP3K4,C2CD2,JARID2,FGF5,PMS1,GBF1,NDC80,SPRED2,CKAP5,PDS5B,SHOC2,WDR43,KIF2A,ZCCHC11,N4BP1,SMARCA5,KIFAP3,ANKRD17,ARHGEF7,PTK2,CUL1,TIPARP,ARAP2,CNOT2,SETX,CLASP1,FARS2,HIVEP2,RB1,TGIF1,DNAJB6,FXR1,PPFIA1,HIVEP1,ASCC3,POLR2B,TP53BP1,PPP1R12A,ACSL3,MEF2A,XPO1,MYCBP2,TNFAIP8	1.83753	0	0.0186062
GSE7460_CD8_TCELL_VS_TREG_ACT_DN	post2ndALVAC.24hours	-1.96411	0	0.0038041	NUP93,NDC80,AURKB,IPO9,AGRP,ACO2,SMC3,PDK3,TIAM1,CISH,PDS5B,SOD1,CDK4,MCM3,GRHL1,ANKRD28,STK24,NUP107,PSMD12,UTP18,HSPA14,ANKRD13C,AKAP11,NUP37,MCM7,HNRNPM,DDX1,MYBL1,TMX1,CENPM,AVEN,TEAD1,VAMP7,RB1,KIAA1524,ZNF24,CTDSPL2,SRSF10,VDAC1,PRMT3,PTPN1,POLR2B,BUB3,CCND3,LTV1,CSE1L,PSMA4,TNFRSF18,SLC29A1,RCN2	1.76965	0	0.034257
GNF2_ITGAL	post2ndALVAC.24hours	-1.9646	0	0.00381289	PTPN4,CD97,BIN2,BTN3A3,VPS16,FAM108A1,SNRK,GPR65,FYN,PTGER2,NPRL2,STK38,TRAF3IP3,SIPA1,LCP2,RASSF1,PARP8,ARL4C,JAK1,PRKCH,CASP8,ARHGEF3,SEMA4D,RAP1B	1.76329	0.00131926	0.03482
GSE40273_GATA1_KO_VS_WT_TREG_DN	post2ndALVAC.24hours	-1.96359	0	0.00381386	CREB1,ZNF639,CALHM2,PLXNC1,MED12,AKAP12,KDM2B,RALGPS2,FBXO34,SMPDL3A,ADD3,NCOA3,HIF1A,CLCF1,CD200,ARHGAP17,MAP7,PARP8,BMP2K,FAM69A,MAP3K1,GPR18,CTU2,HNRNPH3,ANKRD11,JAK1,ARID5B,SNX10,CRTC3,BEND5,ATE1,STX7,POLD1,ACTG1,PTPN1,CARD11,MEF2C,ITPR1	1.75377	0	0.0361055
GSE13485_PRE_VS_POST_YF17D_VACCINATION_PBMC_DN	post2ndALVAC.24hours	-1.95959	0	0.00396648	IDH1,IFIH1,MSR1,ZDHHC16,TRIM69,IFI44L,TDRD7,MYOF,DDX60,STAT1,PLXNC1,USP18,OAS1,DHX58,ACAD9,SPATS2L,IDE,CMPK2,AIM2,SIGLEC1,GBP1,IRF7,PRPSAP1,STAMBP,VPS45,ANXA2,RB1,FGL2,IPO8,GTPBP2,MARCH1,DYNC1I2,ANKRD22,PSME2,PLAC8,GOT2,GTF2H1,RAD50,RPE,SIDT2,TAP1,CYSLTR1,DTX3L,SERPING1,SMARCAL1	1.92536	0	0.00958895
GSE339_EX_VIVO_VS_IN_CULTURE_CD4POS_DC_DN	post2ndALVAC.24hours	-1.94912	0	0.00429255	INHBC,KIF2A,SMARCA5,ANKRD28,SCIN,CWC22,KRT84,UBL3,PRDX1,CHRNA1,PLSCR1,TBK1,DNAJA2,GOLGA4,CD83,STXBP3,STAT4,SNX4,ANXA10,MDM2,HAS1,ARF4,IL1RN,PRKRIR,KTN1,ANXA2,HIVEP2,WAC,TGIF1,TMED7,HNRNPA2B1,DNAJB6,UBE2D3,NAE1,CCNC,ELL2,HSPE1,B3GNT2,M6PR,RAP1B,CNOT4,HSPA9,H2AFZ	1.72648	0	0.0411522
GSE13411_SWITCHED_MEMORY_BCELL_VS_PLASMA_CELL_UP	post2ndALVAC.24hours	-1.94931	0	0.00431316	EXT2,PCNX,CHD1,CORO1A,ATP2B1,MED14,RHOH,RHOG,TIPRL,GIT2,METTL22,ARHGAP24,FRAT1,NFRKB,EIF2B5,DDX60,TRAF3IP2,SLC25A24,PRPF3,ZFYVE16,USP39,TMUB2,NKRF,RAPGEF6,TRMT61B,PTK2,DUSP6,AUTS2,ZMYND8,RASSF1,CCNT2,MYC,KDM3A,HHEX,TCEAL1,RNFT1,PARP8,PLEKHF2,ATAD2B,CAPRIN2,SOCS1,ANXA1,SNX10,LBH,SIAH1,PEX26,RIPK2,PPFIA1,NFKB1,VPS13D,DET1,RSBN1,TRIM33,SMARCAL1	1.82778	0	0.0193671
GSE37533_PPARG1_FOXP3_VS_FOXP3_TRANSDUCED_CD4_TCELL_DN	post2ndALVAC.24hours	-1.94286	0	0.0045442	GTF2B,PML,CASP10,BTN3A3,PARP12,ISG15,RNF19B,CTNNBL1,IFI6,UBA7,IFITM1,IFIT1,OASL,WARS,OAS2,PCNX,CSF1,ISG20,IFIH1,GTPBP1,IFI44L,SLC25A28,TDRD7,TRIM14,DDX60,N4BP1,STAT1,PLSCR1,TRIM21,NMI,USP15,USP18,OAS1,DHX58,FAM46A,SPATS2L,CBR3,TAP2,GBP1,IRF7,SIAH2,BAZ1A,TNFSF10,SOCS1,GCH1,JAK2,RIPK2,PSMB10,PSME2,HIVEP1,GBP2,CASP7,SIDT2,TAP1,MEF2C,ELF1,IDO1,DNAJA1,PSME1,MYCBP2	1.83681	0	0.0186681
GSE17721_LPS_VS_POLYIC_4H_BMDC_UP	post2ndALVAC.24hours	-1.9393	0	0.00475863	SNX10,BMP15,SMU1,TUFM,TMEM2,RPE,ACOT9,HSD17B3,LTV1,ASF1A,ZNF22,DNAJB11,B3GNT2,PLAGL1,RAP1B,SAR1A,CRBN,ITGB1,RILPL2	1.73712	0	0.0388557
MORF_CDC16	post2ndALVAC.24hours	-1.93757	0	0.00481348	SMARCC1,EIF4EBP2,POM121,DKC1,KRIT1,MAPRE1,ASXL1,PRKDC,SDHB,CDC16,DEAF1,TM9SF2,AK2,TREX2,MPHOSPH9,USP24,XRCC5,VDAC3,VDAC2,IARS,ANP32A,PDIA6,PRPF40A,DUT,HNRNPD,HNRNPR,MYCBP2,PPP1CC	1.83501	0	0.0188652
BIDUS_METASTASIS_UP	post2ndALVAC.24hours	-1.93703	0	0.0048189	TTF2,DEPDC1,STK24,SQLE,MPHOSPH9,FBXO3,PREPL,SRSF1,ODC1,HUWE1,RACGAP1,G3BP1,PATL1,CCNA2,LCA5L,RBBP4,PNMA1,HNRNPH3,RRM1,YBX1,VDAC1,HNRNPA2B1,PSMD10,PLK4,MEAF6,HNRNPD,TRA2B,NONO,CSE1L,CDYL,CEP57,NUP153,ADNP,HNRNPR,RABGGTB,YTHDF1,H2AFZ	1.84878	0	0.0174625
GSE33424_CD161_INT_VS_NEG_CD8_TCELL_UP	post2ndALVAC.24hours	-1.93558	0	0.00487033	TOMM70A,ELL3,PARP14,VPRBP,TRIM5,AGRN,YARS,PML,NT5C3,PARP12,ISG15,KIAA0020,NMRAL1,SERPINI1,ASNS,WDR75,GPR65,SMYD2,IFIT1,OASL,OAS2,CSF1,ISG20,IFIH1,CHD7,IFI44L,SLC25A12,MDN1,TDRD7,TAPBP,PAPD7,DDX60,N4BP1,STAT1,GNL3,TRIM21,NMI,GART,USP18,OAS1,DHX58,PABPC1,CMPK2,GBP6,INPP1,IRF7,LPAR6,CSDE1,BAZ1A,TNFSF10,ZEB2,N6AMT1,NLRC5,SETDB2,MPHOSPH10,DLL1,PLAC8,GBP2,ELF1,LIPT1,PPM1K,DTX3L,MTHFD1,SMARCAL1	1.84702	0	0.0176119
GO_RIBONUCLEOPROTEIN_GRANULE	post2ndALVAC.24hours	-1.93341	0	0.00492505	RPL6,PAN2,ASZ1,TRIM21,TDRKH,CIRBP,PUM1,PABPC1,EDC3,MOV10,DDX1,CNOT2,G3BP1,PATL1,ARNTL,BTBD1,EIF2C1,FASTKD5,DHX9,YBX1,TIAL1,FXR1,HENMT1,PSMA6,DDX3Y,RBM4,RC3H1,CNOT7,CDC42,PSMA4,HNRNPL,PSMA2	1.7439	0.00112233	0.0375971
DEURIG_T_CELL_PROLYMPHOCYTIC_LEUKEMIA_DN	post2ndALVAC.24hours	-1.9304	0	0.00498159	FYN,CTR9,NLRP1,ACAT1,IKZF3,HIP1R,GIT2,CXCR5,TIAM1,ATG16L1,GNB5,CHN1,CREBZF,PION,UBL3,EED,PRF1,PRDM1,HSPA14,SNRPN,THOC1,TRIM23,STAT4,NKG7,NPAT,LPAR6,ARNTL,STK17A,KLRD1,TNFSF10,GCH1,HNRNPH3,KLRF1,PCM1,GBP2,TNIK,CDC42,CEP57,ID2,USP16,NFX1	1.87624	0	0.0141414
GNF2_INPP5D	post2ndALVAC.24hours	-1.91542	0	0.00582218	CORO1A,RAC2,TAPBP,CD48,WIPF1,SIPA1,SASH3,GRK6,CSK,PSMB10,TAP1,PSME1,RAP1B	1.86042	0.00390625	0.0159998
GSE34006_A2AR_KO_VS_A2AR_AGONIST_TREATED_TREG_UP	post2ndALVAC.24hours	-1.91394	0	0.0059438	MTFMT,SLC25A28,TDRD7,TAPBP,ETNK1,WDR43,HK1,DDX60,TRAF3IP2,N4BP1,CMTM6,STAT1,RAPGEF6,TRIM21,NMI,RBM43,USP18,WTAP,OAS1,DHX58,VPS54,RCL1,CMPK2,MOV10,GBP6,INPP1,MAP7,SS18,CRLF3,IRF7,SECISBP2,TNFSF10,PEX26,PCCA,PSMB10,PSME2,NUB1,CASP8,GBP2,TAP1,ITK,B3GNT2,PSME1,CRBN	1.92005	0	0.0101045
GSE32423_MEMORY_VS_NAIVE_CD8_TCELL_IL7_IL4_DN	post2ndALVAC.24hours	-1.91347	0	0.00597088	METAP1,ARMCX1,TAGAP,IPO11,ANKRD28,SLC4A1AP,LUC7L3,UBE2E3,GLE1,TRIM23,LCP2,TTC37,PTPRF,ATAD2B,ASNSD1,LEO1,TTC9C,ZNF24,PCCA,CCDC132,PMPCB,ZNF277,SRP54,ASCC3,HNRNPC,BUB3,ANXA7,CDKN2AIP,BCLAF1,TASP1,TERF2IP,RCN2,COPS4	1.74476	0	0.0377059
GSE6674_UNSTIM_VS_ANTI_IGM_AND_CPG_STIM_BCELL_DN	post2ndALVAC.24hours	-1.9135	0	0.00597655	SRFBP1,GNL3,TUBA4A,CIRH1A,UTP18,RRP9,FAM188A,ODC1,LCP2,DUS1L,PLEKHA3,MYC,ATAD1,NEDD9,ATP8B2,SIAH2,SOCS1,BYSL,RASA2,DDX54,EEF1E1,LYPLA2,BTG3,BRIX1,G3BP2,PDCD1LG2,PPP1R12A,DET1,SENP3,USO1,ANKIB1,MORC2,HSPA9	1.72695	0	0.0412469
REACTOME_INTERFERON_SIGNALING	post2ndALVAC.24hours	-1.91224	0	0.00602166	ISG15,PTPN6,SEH1L,IFI6,NEDD4,POM121,UBA7,IFITM1,NUP50,IFIT1,OASL,IP6K2,OAS2,NUP93,ISG20,PPM1B,CD44,STAT1,NUP107,USP18,OAS1,NUP37,GBP6,GBP1,IRF7,NUP155,NUP35,SOCS1,NUP205,CAMK2D,NUPL2,JAK1,JAK2,PTPN1,KPNA2,GBP2,SUMO1,NUP210,EIF4G2,EIF4A1,NUP153,EIF4A2,TPR	1.86667	0	0.0154524
GGCNKCCATNK_UNKNOWN	post2ndALVAC.24hours	-1.91179	0	0.00602381	ARID4A,RNF145,HNRNPK,RAD21,SMYD5,SYNCRIP,WHSC1L1,MIOS,LUC7L3,CRYZL1,PUM1,NIM1,NASP,PATL1,BRD2,RAB30,ZBTB40,PAFAH1B1,SAR1B,TTC9C,YBX1,HMGN2,DPYSL2,CHTOP,EIF4G2,MATR3,EIF4A1,ADNP,PPP1CC,RBM26	1.80899	0	0.0227833
GSE29618_BCELL_VS_MDC_UP	post2ndALVAC.24hours	-1.9097	0	0.00617055	EIF2AK3,ISG20,CLMN,RHOH,IKZF3,TSPYL1,CHD7,IGKC,CXCR5,SPTBN1,SHOC2,ARHGAP24,STAP1,TLE1,GABPB1,PWP1,TUBA4A,ADD3,FAM3C,ODC1,TSC22D3,AIM2,FCRL2,P2RY10,MYC,MPP6,STK17A,KCNA3,RAB30,MCTP2,GPR18,ARID5B,EZR,LBH,PHF3,YTHDC1,TSPAN3,CYFIP2,ELL2,ITPR1,SP140,CD81,EIF4A2,TXNIP,TERF2IP	1.7659	0.00108342	0.0345439
GSE26890_CXCR1_NEG_VS_POS_EFFECTOR_CD8_TCELL_UP	post2ndALVAC.24hours	-1.90832	0	0.0062601	ZCCHC11,DDX60,GTF3C2,APPBP2,SCIN,STAT1,ZC3H11A,SQLE,TRIM21,USP18,FBXO34,OAS1,CNOT6L,PABPC1,CMPK2,FAP,GBP6,INPP1,MLEC,IRF7,CLDND1,LPAR6,CSDE1,BAZ1A,TNFSF10,AXL,ZEB2,MRPL1,UTP14A,NLRC5,SETDB2,DLL1,PLAC8,ZNF277,G3BP2,GBP2,NOL7,ELF1,DTX3L,KIAA1967,INPP4B	1.83345	0	0.0189329
GSE33425_CD161_INT_VS_NEG_CD8_TCELL_DN	post2ndALVAC.24hours	-1.90595	0	0.00636712	EPS15,ZC3H12C,SYPL1,SLC25A15,CDC42SE2,MCART6,PSMD14,GNS,UBA3,ERP29,CTSH,CHD1,TRNT1,HSD17B11,DIDO1,FAM49B,CXCR5,WBP4,SACM1L,EEA1,NUCB2,TFAM,OAT,SSPN,UBL3,ALOX15,PLSCR1,RALGPS2,CD83,STXBP3,TK2,FAM91A1,TIPARP,AP1G1,RNFT1,ASNSD1,MTPN,CD40,GNG10,ITFG1,ANXA2,ANXA1,SNX5,MCL1,SNX10,STX7,UPF3B,ADAM10,UBE2D3,EI24,IMMP1L,PLAC8,ADM,SPG21,ROCK1,PSPC1,ANXA7,MYCBP2,GOSR2	1.82576	0	0.0197858
GSE13547_WT_VS_ZFX_KO_BCELL_DN	post2ndALVAC.24hours	-1.89286	0	0.00718991	RPA2,MPHOSPH6,BATF,PION,LIG1,PSMD12,PRDM1,NME1,CLIC4,NKG7,H1F0,PSMB2,CLIC1,PGK1,PRR13,GLRX,COPS5,PSMA5,ANXA1,SNX5,SAR1B,SNX10,HMGN2,PSMA6,PLAC8,ACTG1,CEP57,ID2,RAN,PPP1CC,H2AFZ,RILPL2,COPS4	1.79467	0	0.0256557
GO_MICROTUBULE_ORGANIZING_CENTER_PART	post2ndALVAC.24hours	-1.88757	0	0.00761797	CEP170,LRRCC1,SCLT1,NIN,MPHOSPH9,CETN3,CEP55,RP2,CENPJ,CEP192,CLASP1,KATNB1,CEP164,NEDD1,SDCCAG8,CEP250,BBS9,DZIP1,PLK4,ZMYND10,PCM1,CEP290,ROCK1,RAN,ODF2	1.72194	0	0.0423168
GSE9316_CD4_TCELL_BALBC_VS_TH17_ENRI_CD4_TCELL_SKG_PMA_IONO_STIM_FR4NEG_DN	post2ndALVAC.24hours	-1.87737	0	0.00822628	RNF145,TRIM17,RCN1,FBXO22,ETNK1,TM9SF2,OAT,PROSC,NDFIP1,CHMP1B,PLXNC1,WIPF1,IARS2,DR1,STXBP3,LRRTM2,SRSF1,MAP2K1,MAPK6,MTERFD1,MTPN,FNDC1,GNG10,KLRD1,HIVEP2,FGL2,FAM126B,TPM3,MCL1,PTBP2,GRIPAP1,YWHAQ,ZNF23,PIK3R4,CTNNB1,SRSF7,ELF1,ACSS1,ARHGEF3,DDX5,ID2,RAP1B,RCN2	1.72935	0	0.0410464
GSE22886_NAIVE_CD4_TCELL_VS_NKCELL_DN	post2ndALVAC.24hours	-1.87189	0	0.00859056	ALAS1,KRIT1,TRIP12,ZNF226,CTR9,IDH1,SUV420H1,MRPS22,TIPRL,MRFAP1L1,BARD1,PTPN22,POLE2,ZFAND6,ZFYVE16,KIFAP3,WIPF1,TRAF5,NUP107,WDR67,RSF1,INTS6,TIMM8B,ARAP2,INPP1,MLEC,TRIP4,STAMBP,NEK7,KLRD1,CDK12,STK39,MED8,BIRC2,MCTP2,SNX5,GGNBP2,LARP7,STX7,PIGB,RAD50,MUDENG,ACSL3,UTP14C,UTP11L,PLAGL1,PPP1R8	1.70674	0.0010846	0.0465189
GSE19888_ADENOSINE_A3R_INH_PRETREAT_AND_ACT_BY_A3R_VS_TCELL_MEMBRANES_ACT_MAST_CELL_UP	post2ndALVAC.24hours	-1.87002	0	0.00870896	IFI44L,TAPBP,ETNK1,STAT1,NAAA,TRIM21,NMI,RBM43,USP18,OAS1,DHX58,CMPK2,LCP2,GBP6,INPP1,IRF7,CD40,TNFSF10,SLAMF8,GCH1,SNX10,STX7,SAMSN1,SETDB2,PSMB10,MLKL,PSME2,FANCA,CASP8,GBP2,TAP1,DTX3L,VWA5A,PSME1,RAP1B	1.9125	0	0.0100875
GSE5503_MLN_DC_VS_SPLEEN_DC_ACTIVATED_ALLOGENIC_TCELL_DN	post2ndALVAC.24hours	-1.86788	0	0.00877158	HCRTR2,TIAM1,ATP6V1C1,MDN1,TRAIP,NKAP,MLX,APAF1,FDPS,MSN,SRFBP1,NARFL,MPHOSPH9,FAM3C,TMEM183A,BMP2K,RAD51C,ILF2,NUP35,CSNK2A1,RB1,MRPL1,REEP4,PSMF1,CTPS,FXR1,SNRNP40,EZH2,ACTL6A,VPS13D,GIN1,ORC5,TIMM9,CCT8,HSPH1,CSE1L,ZNF274,ACSS1,TASP1,B3GNT2	1.74113	0	0.0380841
GNF2_DENR	post2ndALVAC.24hours	-1.867	0	0.00880435	SUMO2,RWDD1,HNRNPA1,HNRNPH3,RBM15,ZNF146,SPCS2,MPHOSPH10,INTS8,DDX47,TRA2B,ZNF22,XPO1,HNRNPR,PAPOLA	1.84021	0	0.0184332
GSE45365_HEALTHY_VS_MCMV_INFECTION_CD8A_DC_DN	post2ndALVAC.24hours	-1.85282	0	0.00976207	FAM49B,LRP12,IFIH1,MMP19,BARD1,OTUD4,MAPK1IP1L,SLC25A28,TDRD7,TMEM59L,CD48,NLRP3,PRPF3,ZFYVE16,PLSCR1,NPTN,HSP90AB1,PSMA3,HYAL2,FAM46A,SMURF2,POGZ,AKR1B1,HNRNPM,IRF7,CDC37,SCN1B,MFHAS1,GLRX,TNFSF10,MED8,HIVEP2,GCH1,SNIP1,MAP2K3,TMEM2,CGGBP1,HNRNPC,ACOT9,ELL2,CORO1C,HSPE1,RNF19A,DHX15,SAR1A,PSMA2	1.75255	0	0.0359659
GSE35825_IFNA_VS_IFNG_STIM_MACROPHAGE_UP	post2ndALVAC.24hours	-1.85174	0	0.00978128	PAPD7,ARMCX1,TTC39C,OTUD7A,DDX60,NLRP3,STAT1,BATF,PION,SRFBP1,HIF1A,MDM2,CMPK2,CFB,GBP6,IRF7,BRD2,CD40,IL1RN,KTN1,SOCS1,HIVEP2,GCH1,ANP32A,SNX10,SAMSN1,NFKB1,GBP2,TAP1,ACOT9,ZFAND5,RAP1B	2.00803	0	0.00688628
GSE21927_SPLEEN_C57BL6_VS_4T1_TUMOR_BALBC_MONOCYTES_DN	post2ndALVAC.24hours	-1.85104	0	0.0098159	CASP10,BTN3A3,PARP12,TRIM62,RNF34,ISG15,ATG3,IFI6,FCHSD2,UBA7,IFITM1,TMEM126B,IFIT1,OASL,DCP1A,OAS2,NFYA,ISG20,IFIH1,TNK2,GTPBP1,IFI44L,SLC25A28,TDRD7,BRD7,TRIM14,DDX60,N4BP1,LEPREL1,UBE2Q1,WHSC1L1,PLSCR1,TRIM21,NMI,USP15,USP18,OAS1,CHMP5,DHX58,PPCDC,FAM46A,MAD2L1BP,SPATS2L,GBP1,IRF7,MYL12A,IARS,KCNA3,PSMA5,GTPBP2,MCL1,HMGN2,UBE2D3,PSME2,MMADHC,ZNF410,ELF1,DNAJA1,EIF4A2	1.89101	0	0.0124024
GSE25088_IL4_VS_IL4_AND_ROSIGLITAZONE_STIM_STAT6_KO_MACROPHAGE_DAY10_DN	post2ndALVAC.24hours	-1.84499	0	0.0102535	DDX60,STAT5A,PLSCR1,PRF1,ZC3H11A,P2RY14,TBK1,RELA,WTAP,TRAF3,SASH3,MAP2K1,CFB,BHLHE40,TAP2,ARF4,SCN1B,BRD2,SOCS1,ZEB2,ZNF438,PDIA6,SNX10,PSMB4,NFKB1,G3BP2,HNRNPC,ACOT9,UBR1,ELF1,ANXA7,ZNF274,DTX3L,SP140,SERPING1,DNAJB11	1.81416	0	0.0215055
GSE22601_IMMATURE_CD4_SINGLE_POSITIVE_VS_CD8_SINGLE_POSITIVE_THYMOCYTE_DN	post2ndALVAC.24hours	-1.84468	0	0.0102567	EMP1,IL6ST,UBA3,CDKN2D,CSF1,SELP,OSM,WDR44,ZNF281,ARMCX3,CHD7,APEX1,PPRC1,STAT1,WHSC1L1,PLSCR1,GNL3,P2RY14,RAPGEF6,FAM133B,PRDM1,NFE2L2,CIRBP,VPS54,ODC1,TIPARP,HIF1A,SEC24A,SLC35F5,ARAP2,GBP6,BHLHE40,STX11,FRMD4B,IRF7,MAPK6,KLHDC2,BMP2K,KBTBD8,SOCS1,GPLD1,JAK2,SAMSN1,PTPN1,G3BP2,DTX3L,RNF19A,SEMA4D,TNFAIP8	1.92607	0	0.00962837
GSE21546_WT_VS_SAP1A_KO_DP_THYMOCYTES_UP	post2ndALVAC.24hours	-1.84505	0.00153846	0.0102798	TRIM69,IFI44L,SLC25A28,TDRD7,TRIM14,DDX60,PRPF3,STAT1,PLSCR1,TRIM21,NMI,RBM43,USP18,CRYZ,OAS1,DHX58,KEL,FAM46A,SPATS2L,CMPK2,MOV10,TAP2,GBP1,IRF7,PATL1,BAZ1A,BIRC2,PSMG2,NLRC5,PSME2,NUB1,CASP7,SIDT2,TAP1,DNAJA1,DTX3L,PSME1,ANKIB1	1.91721	0	0.0101201
GSE21380_NON_TFH_VS_GERMINAL_CENTER_TFH_CD4_TCELL_DN	post2ndALVAC.24hours	-1.83842	0	0.0108174	KIAA1429,B4GALT4,JMJD1C,MKS1,MANBA,CAPZA2,UTRN,SMC3,ARID4A,ZNF280D,SEPT10,C1GALT1C1,EIF4ENIF1,APAF1,CREB1,ZFAND6,LRRCC1,EIF5B,USP15,TMEM135,HIF1A,RP2,IARS,SELT,ATP8B2,RAD51C,MAP2K6,PTBP2,STX7,MLKL,MORF4L1,CWF19L2,CSNK1G3,PPP1R12A,ITPR1,VWA5A,XPO1,COPS3,TASP1,TERF2IP,RPF1	1.93865	0	0.00839084
GSE17721_0.5H_VS_12H_LPS_BMDC_DN	post2ndALVAC.24hours	-1.8361	0	0.0110011	P2RY14,ZBTB37,RBM43,DUSP26,YKT6,NCOA3,CD200,ARHGAP17,VDAC3,PTX3,CCNT2,ATAD1,MAPK6,TXLNG,METTL6,IGBP1,CYP27B1,UGP2,ANXA1,GCH1,CEP350,HNRNPH3,RASA2,VPREB3,EEF1E1,TMED7,JAK2,SAMSN1,IMMP1L,PMPCB,NFKB1,CGGBP1,G3BP2,GBP2,RPE,ILF3,STARD3NL,GTF2E2,CD81,NUDT9	1.85818	0	0.0158334
GO_ANTIGEN_PROCESSING_AND_PRESENTATION_OF_PEPTIDE_ANTIGEN_VIA_MHC_CLASS_I	post2ndALVAC.24hours	-1.828	0.00158228	0.0119609	AZGP1,PSMC4,PSMC5,TAPBP,PSMD6,HFE,PSMC1,SEC31A,PSMD12,PSMA3,SEC24A,TAP2,PSMB2,PSMA5,SAR1B,PSMF1,PSMD10,PSMB4,ERAP2,PSMA6,PSMB10,PSME2,PDIA3,TAP1,PSMA4,PSME1,PSMA2	1.75162	0	0.0357583
GSE22886_NAIVE_CD4_TCELL_VS_MEMORY_TCELL_DN	post2ndALVAC.24hours	-1.82654	0	0.0120652	SIRT1,PMS1,INTS5,PEX13,CPEB3,VPS33A,CBLL1,IFIH1,MRFAP1L1,HIGD1A,SHOC2,UBA2,TM9SF2,TPM1,ZFAND6,TTF2,PRDX1,TRAF5,GABARAPL2,UFM1,ELK3,STXBP3,MAEA,WTAP,ERLIN1,RWDD1,GOLGA5,MRPL15,TRIP4,GBP1,LPAR6,FAM69A,RIOK2,YWHAZ,GRK6,ST8SIA4,SNX5,PNMA1,FPGT,DYNLT3,GTF2H1,MGAT2,KDM3B,TSNAX,ASF1A,NCK1,CEP57,ATP5A1,COPS4	1.91156	0	0.00992958
GSE15930_STIM_VS_STIM_AND_TRICHOSTATINA_48H_CD8_T_CELL_DN	post2ndALVAC.24hours	-1.82597	0	0.0121086	FAM117A,FABP9,SPRED2,PELO,ISG20,IFIH1,AGRP,WBP4,ATP1A1,SLC25A28,TAPBP,EEA1,MTX2,ETNK1,SMYD5,CMTM6,STAT1,TBP,TUBA4A,TRIM21,NMI,USP15,STXBP3,USP18,PABPC1,FAM3C,CMPK2,MOV10,POLDIP3,DUSP6,TAP2,ATAD1,HHEX,IRF7,NCAM2,EXOSC10,ZRANB1,DNAJA3,SOCS1,GTPBP2,FASTKD5,ATP13A1,PSME2,NFKB1,TAP1,SYNGR2,B3GNT2,PSME1,PPP2R3C	1.84657	0	0.0173776
GSE41867_NAIVE_VS_DAY30_LCMV_CLONE13_EXHAUSTED_CD8_TCELL_DN	post2ndALVAC.24hours	-1.82485	0	0.0122443	AP3M1,FAM117A,FBXO4,ECH1,IDH1,UBN1,DHRS1,MBTPS1,NCKAP1L,ERGIC3,MIA3,TMEM9,TMED3,RAI1,DPY19L3,SLC25A24,ZC3H11A,CALU,ZNF420,SMPDL3A,YIPF4,FAM3C,SNAP23,PSRC1,UHRF2,ZMYND8,SETX,RAPGEF1,MAP3K1,CCNI,ANXA2,DDX26B,COG3,HNRNPH3,PDIA6,LBH,PHF3,DDX17,IQCB1,TAX1BP1,NUP210,CYFIP2,COPS3,TXNIP,SLC35A2	1.72102	0.00328947	0.042451
AACTGAC_MIR223	post2ndALVAC.24hours	-1.82154	0	0.0124195	ATP7A,RNF34,SP3,SCN3A,MAP1B,KIAA0355,IL6ST,ATP2B1,VNN1,UBTF,SRGAP3,PDS5B,DUSP10,NLRP3,OLFM1,ANKRD17,RALGPS2,PRDM1,EPB41L3,RASA1,HHEX,MTPN,RPS6KB1,FBXO8,STK39,PTBP2,PDE4D,MEF2C,SEPT6,HERC4,SON,RCN2	1.75674	0	0.0357693
GSE21360_PRIMARY_VS_QUATERNARY_MEMORY_CD8_TCELL_DN	post2ndALVAC.24hours	-1.82156	0	0.0124367	DHRS1,PIK3CA,IFI44L,TDRD7,FRAT1,SNX3,CITED2,TRIM14,CREB1,ZFAND6,ZFYVE16,UBL3,ZC3H11A,TRAF5,NPFF,ARFGEF1,LETMD1,ASTE1,AKAP9,STAT4,ADD3,SSH3,TSC22D3,SMURF2,ATP6AP2,IRF7,SETD2,PARP8,ARNTL,KCNA3,ERBB2IP,TOP2B,IKBKB,SERINC3,CEP350,MORF4L1,PCF11,HSD17B3,PPP1R12A,DET1,LIPT1,LEMD3,RSBN1,RBM26,SON,TTC17	1.7535	0	0.0360483
BROCKE_APOPTOSIS_REVERSED_BY_IL6	post2ndALVAC.24hours	-1.82195	0	0.0124568	CD44,PTPN11,RHOBTB3,STK17B,ANAPC10,STAT1,PTPRG,PAN2,PLSCR1,DNAJA2,PRDM1,NMI,OAS1,FAM3C,ZBTB11,BHLHE40,LTBP1,GATM,TNFSF10,SOCS1,RB1,MCL1,DPM1,LRMP,TGIF1,EEF1E1,TMED7,CCNC,EVI2B,ELL2,VWA5A,RCN2	1.9339	0	0.00878833
GSE28237_FOLLICULAR_VS_EARLY_GC_BCELL_DN	post2ndALVAC.24hours	-1.82174	0	0.0124668	API5,RHOH,SFT2D2,DHRS1,CD44,PTPN11,PSAT1,NGLY1,ACO2,KIAA0101,CDC16,SHMT1,NSA2,ECT2,ZRANB3,PDE3B,NUP107,PSMD12,DNAJA2,CDC5L,ATP5F1,PABPC1,MCM7,CEP55,CUL1,TRIM37,DMP1,RPS6KB1,CDCA7L,PRDM4,TOP2B,NUP205,ERCC3,STC2,FXR1,SMU1,CXorf40A,CASP8,KPNA2,RNF19A,ZFAND5,RABGGTB,COPS4	1.7589	0.00108108	0.0359565
GSE18791_CTRL_VS_NEWCASTLE_VIRUS_DC_4H_DN	post2ndALVAC.24hours	-1.81538	0	0.0131358	PARP14,NR2E1,LRRC48,ZNF107,CSRNP1,B3GAT2,RICTOR,PML,NT5C3,ISG15,C1GALT1,DNAJB5,IFI6,IFITM1,IFIT1,OASL,DCP1A,OAS2,NDC80,PELO,ISG20,PROC,SIRPG,IFIH1,HIST1H1T,IFI44L,SLC25A28,PAPD7,KIF2A,DDX60,DENND2C,PLSCR1,TRIM21,MASTL,USP18,FBXO34,DHX58,S100A7,FAM46A,CMPK2,IRF7,MAK,PATL1,CLK1,TNFSF10,GCH1,GTPBP2,UNC93B1,TGIF1,NLRC5,USP42,MYO10,ZNF687,ADM,SORBS3,TAP1,PPM1K,DTX3L	1.70614	0	0.0467256
CHEN_HOXA5_TARGETS_9HR_UP	post2ndALVAC.24hours	-1.81255	0	0.0133661	TBK1,WDR67,CDK7,INTS6,NCOA3,TIPARP,SEC24A,ZNF451,DUSP6,CNOT2,CCNT2,KDM3A,RBBP6,ZCCHC8,NEDD9,CLK1,ARNTL,BIRC2,WAC,SNX5,MCL1,SRSF10,RBM15,PTBP2,DMTF1,RIPK2,SCG5,ZNF184,PSPC1,PPP1R12A,ZNF274,CDKN2AIP,CNOT4,RABGGTB	1.86903	0	0.0148877
BYSTROEM_CORRELATED_WITH_IL5_DN	post2ndALVAC.24hours	-1.80487	0.00333333	0.0142727	NVL,SRSF1,AP1G1,TMPO,HIVEP2,ARNT,ADAM10,SF3B1,CNOT7,CASP7,ZNF22,MATR3,PAPOLA	1.75403	0.00123305	0.0361784
GSE14769_UNSTIM_VS_240MIN_LPS_BMDM_DN	post2ndALVAC.24hours	-1.80396	0	0.0144087	PHF21A,MTMR11,DYRK2,RNF34,CPEB4,SEH1L,STAT3,TGM2,GALR1,KRIT1,RBBP8,DAAM1,WARS,WHAMM,SLU7,ARID4A,TIAM1,SLC25A12,SLC25A28,DTWD1,APAF1,FCF1,TRAF5,CHAC2,P2RY14,MED12,CD83,RELA,FZD1,FAM46A,CLIC4,MOV10,ATAD2B,TOX4,TXLNG,CSF2RB,TANK,IL1RN,ZNF800,HIVEP2,BIRC2,DYNC1I2,USP42,NUB1,HIVEP1,CGGBP1,PHOSPHO2,ACOT9,NCK1,RSBN1,SEMA4D,DOCK10	1.72692	0	0.0411013
GSE40685_TREG_VS_FOXP3_KO_TREG_PRECURSOR_UP	post2ndALVAC.24hours	-1.80158	0	0.014661	IFI44L,FOXR2,ZNF200,TAPBP,DDX60,GUCY1A3,STAT1,SELK,PKHD1,TRIM21,NMI,GOLGA5,CUL1,AIM2,MOV10,PGK1,BAZ1A,CDK12,TNFSF10,SOCS1,GCH1,NLRC5,MARCH1,GRIPAP1,RAPGEF2,ANKRD22,JAK2,PSME2,NUB1,PDIA3,PIGG,GBP2,CASP7,TAP1,NPHP4,ACSS1,SERPING1,PSME1	2.11999	0	0.00548451
ZHAN_MULTIPLE_MYELOMA_SUBGROUPS	post2ndALVAC.24hours	-1.8011	0.00345423	0.0146737	PSMD14,FKBP1A,EWSR1,PRKDC,ACO2,POLD2,XRCC6,UGP2,CKS1B,EZH2,FNTA,SUMO1,UBE2V2	1.89708	0.00134589	0.0117717
GSE41176_WT_VS_TAK1_KO_ANTI_IGM_STIM_BCELL_6H_DN	post2ndALVAC.24hours	-1.79108	0	0.0155877	KIAA0020,PTPN6,KANK1,FCHSD2,KYNU,UBE2D1,TNFRSF4,ANKS1A,EHD1,MAP3K4,ADORA2A,RARS,NR3C1,TUBB,FH,RAC2,CD44,OTUD4,CD48,PFDN1,BMS1,CDK4,TRAF3IP2,N4BP1,PTEN,STAT5A,STAT1,BATF,PLSCR1,TBC1D9,NFKBIA,BECN1,IQGAP2,EIF3M,STAT4,POLR1C,PTX3,GBP1,ZNF330,CD40,IKBKB,ATP6V1H,GCH1,BTG3,DYNC1I2,RIPK2,PSMA6,NFKB1,RUVBL2,NECAP1,RPE,PDHX,M6PR,RABGGTB,TNFAIP8	2.00007	0	0.00604726
GSE21360_NAIVE_VS_QUATERNARY_MEMORY_CD8_TCELL_DN	post2ndALVAC.24hours	-1.79046	0	0.0156177	GTF2B,PML,TRAPPC4,PARP12,ISG15,IFI6,HNRPDL,FCHSD2,ZNF148,FAM98A,IFITM1,POGK,IFIT1,OASL,DCP1A,OAS2,ISG20,IFIH1,ARMCX3,NGLY1,INTS12,IFI44L,TDRD7,METTL21D,STAP1,DOPEY1,DDX60,N4BP1,PLSCR1,TRIM21,NMI,USP18,OAS1,CHMP5,DHX58,FAM46A,MAD2L1BP,FBXO28,NCOA3,HIF1A,IRF7,HIST1H2AC,ZNF330,MPP6,POLG,RBM22,PSMA6,DDX47,TAP1,ELF1,EIF4A1,SP140,B3GNT2,RNF8	2.00449	0	0.00681018
GSE46025_WT_VS_FOXO1_KO_KLRG1_LOW_CD8_EFFECTOR_TCELL_DN	post2ndALVAC.24hours	-1.78757	0	0.0158143	FOXN2,WDR90,PPM1B,ZNF281,UNC13C,PTPN11,PDS5B,CLASP2,DDX52,ZCCHC11,GRM8,ZFAND6,TTF2,TRAF3IP3,CMTM6,IMPA1,WIPF1,PSMD12,PLEKHA1,ELK3,TK2,ZRANB2,YIPF4,FAM3C,CMPK2,SEC24A,VDAC3,DCLRE1A,ZCCHC8,MDH1B,EZR,DYNC1I2,PDE7A,G3BP2,RC3H1,CSNK1G3,ELMOD2,TRA2B,HSPH1,ADNP,RNF19A,ADRBK2,PPP1CC,EIF4A2	1.75504	0	0.0362248
SESTO_RESPONSE_TO_UV_C5	post2ndALVAC.24hours	-1.78518	0.00328407	0.0160398	EPS15,ZNF148,ITGB4,RBBP8,CKAP5,TIAM1,METAP1,HMGA2,GTF3C2,STAT1,NFE2L2,PUM1,RASA1,MYC,PAFAH1B1,EXT1,MCL1,PIK3R4	1.97045	0	0.0076301
DING_LUNG_CANCER_EXPRESSION_BY_COPY_NUMBER	post2ndALVAC.24hours	-1.78367	0.00146413	0.0162169	CBLL1,CHD7,PIK3CA,EID2,MIPEP,WHSC1L1,FBXO3,THOC1,FAM91A1,AKAP9,VPS8,RASA1,MRPS28,MAP3K1,CMAS,SIAH2,IPO8,COG3,FXR1,PPFIA1,COG5,PPP1R12A,SDHC,NUP153,NAPG,METTL4	1.74229	0	0.0380593
GSE45365_HEALTHY_VS_MCMV_INFECTION_CD8A_DC_IFNAR_KO_DN	post2ndALVAC.24hours	-1.78229	0	0.0164065	COL16A1,MMP19,TDRD7,CD48,HMOX1,OAT,NLRP3,PRPF3,ZFYVE16,STAT1,BATF,USP39,CYP1B1,TRIM21,FAM46A,MAD2L1BP,HIF1A,CLCF1,HNRNPM,RBBP6,IRF7,CDC37,MFHAS1,ILF2,GCH1,SNIP1,MAP2K3,JAK2,RIPK2,UBE2D3,EZH2,G3BP2,TAP1,HNRNPAB,ELL2,RNF19A,RAN	1.95545	0	0.00722904
GSE39382_IL3_VS_IL3_IL33_TREATED_MAST_CELL_DN	post2ndALVAC.24hours	-1.77814	0	0.0168278	PTPRU,PML,IMPAD1,TNFAIP6,ISG15,DNAJB5,CD2BP2,CTNNBL1,GRSF1,FCHSD2,MIA,ENY2,ELMO2,PCNX,CSTF3,CRISP1,RHOG,GTPBP1,STK17B,MIA3,SLC25A28,TDRD7,DOPEY1,DDX60,GUCY1A3,KIFAP3,TBC1D9,TRIM21,RELA,GART,USP18,WTAP,OAS1,SPATS2L,CUL1,STX11,POMP,IRF7,CENPJ,FAM69A,IL1RN,B3GNT4,GCH1,SNIP1,MCL1,CLSTN3,TARP,SNX10,MYO10,JAK2,RIPK2,PIGB,PSMB10,NFKB1,PLAC8,TRPC4AP,ACOT9,ID2	1.73205	0	0.0401261
GSE2706_UNSTIM_VS_8H_LPS_DC_DN	post2ndALVAC.24hours	-1.77468	0	0.0170644	PIWIL4,BAALC,OTUD4,RCN1,SLC25A28,DDX60,TRAF3IP3,BATF,PLXNC1,PCID2,GBE1,FEZ1,NMI,RBM43,STAT4,ARAP2,SPAG1,AIM2,CD200,TAP2,STX11,ADC,IRF7,SERPINB7,KCNA3,RAB30,SIAH2,BAZ1A,CYP27B1,EXT1,GCH1,MYO10,RIPK2,HES4,PSME2,NUB1,EZH2,NFKB1,HIVEP1,PTP4A2,DTX3L,SRSF4,TNFAIP8	1.75502	0	0.0360413
GSE18791_CTRL_VS_NEWCASTLE_VIRUS_DC_6H_DN	post2ndALVAC.24hours	-1.77387	0	0.017119	IFIT1,OASL,DCP1A,OAS2,PELO,AURKB,ISG20,IFIH1,SFT2D2,PIWIL4,TRIM69,IFI44L,SLC25A28,PAPD7,TRIM14,DDX60,GRHL1,STAT1,PLSCR1,MASTL,USP18,DHX58,FAM46A,CMPK2,STX11,SIGLEC1,IRF7,MAK,PATL1,CLK1,TNFSF10,SOS1,GCH1,GTPBP2,UNC93B1,TGIF1,NLRC5,USP42,ADM,SLC15A4,TAP1,ACOT9,DTX3L,SEMA4D,GPBP1	1.97249	0	0.00761499
GSE13485_DAY1_VS_DAY3_YF17D_VACCINE_PBMC_DN	post2ndALVAC.24hours	-1.77325	0	0.0171833	GRSF1,CTNND1,TUBD1,FAM98A,RHEB,IFITM1,TCF7L2,SMC2,RBBP8,EXT2,FBXO4,FANCM,FH,IFIH1,TRIM69,IFI44L,SLC25A12,ATP6V0E1,DDX60,PPRC1,STAT1,PLSCR1,SCLT1,NMI,USP18,DHX58,CMPK2,SEC24A,DUSP6,SIGLEC1,GBP1,RNFT1,POP4,NEDD9,BMP2K,ZNF684,COPS5,CHCHD3,GCH1,COG3,ME2,PSME2,RAD50,CASP7,SIDT2,TAP1,ZNF410,NCK1,SERPING1,PPP2R3C	1.72493	0.00110132	0.0419139
MODULE_306	post2ndALVAC.24hours	-1.77045	0.00168919	0.0175807	LDHA,PCK1,IDH3G,FH,IDH1,SDHB,ACO2,PGAM1,PFKM,ENO1,SUCLG1,PGK1,IDH3B,MDH1,IDH2	1.70389	0.00260417	0.046996
GSE2770_TGFB_AND_IL4_VS_TGFB_AND_IL12_TREATED_ACT_CD4_TCELL_6H_DN	post2ndALVAC.24hours	-1.76842	0	0.0178545	DCP1A,TOP3A,R3HDM1,SCAMP1,IKZF3,HIST1H1T,SNX13,CXCR5,SOD1,OTUD4,PLA2G16,ATP6V1B2,DDX60,ITM2A,MED12,RAPGEF6,ARFGEF1,OAS1,VPS54,IDE,TSC22D3,BHLHE40,FGF13,NUF2,KATNB1,STK39,CRTC2,RBBP4,BTLA,MCL1,ANP32A,HNRNPA2B1,DNAJB6,PHF3,RALGAPA1,SLAMF6,VWA5A,RNF19A,HERC4,SON,EIF4A2,TXNIP	1.80181	0	0.0240917
NUNODA_RESPONSE_TO_DASATINIB_IMATINIB_UP	post2ndALVAC.24hours	-1.76224	0.00516351	0.0185195	CDK5R1,CDK4,NFKBIA,MYC,CCNA2,MCL1,NFKB1,RAD50,CASP7,CCND3	1.80571	0.0027027	0.0234972
GSE15930_STIM_VS_STIM_AND_IFNAB_72H_CD8_T_CELL_DN	post2ndALVAC.24hours	-1.76245	0	0.0185377	RMND1,CUEDC2,SCAMP1,SLU7,CAPZA2,PGAM1,PHLDA2,CISH,SEPT10,TCEA1,PIP4K2A,ATP6V1B2,IL1RAP,ENO1,SELK,MRPL38,COQ9,SIGLEC1,ATP6AP2,IRF7,IL1RN,KTN1,DNAJA3,RBBP4,MCM5,ATP6V1H,GCH1,TBRG4,MPHOSPH10,INTS8,PMPCB,PRMT3,WNT10B,ROCK1,SLC25A4,ZNF274,MATR3,SYNGR2,ATP5A1,COPS3,RBM26,SLC35A2	1.75313	0	0.0360424
GSE45365_WT_VS_IFNAR_KO_CD8A_DC_DN	post2ndALVAC.24hours	-1.76264	0.0014771	0.0185424	ARHGEF2,MARK3,STAT3,IFITM1,LRRFIP2,EHD1,DCTN4,WARS,PCNX,SPRED2,LRP12,IFIH1,WAPAL,COL16A1,OTUD4,SLC25A28,BZW1,STAT5A,PRPF3,PLXNC1,PSMC1,NFKBIA,TRIM21,NMI,DHX58,MAD2L1BP,APOA1,ARAP2,KLHL23,POMP,IRF7,CDC37,MFHAS1,GLRX,HIVEP2,ST8SIA4,SNIP1,DKKL1,RAPGEF2,MAP2K3,PEX26,PSME2,RBM4,PTPN1,SRP54,GBP2,TAP1,ELL2,RNF19A,SAR1A,GRPEL1	1.83298	0	0.0188961
GO_ATP_DEPENDENT_DNA_HELICASE_ACTIVITY	post2ndALVAC.24hours	-1.75828	0.00175747	0.0189418	XRCC6,MCM7,XRCC5,G3BP1,ERCC3,DHX9,ASCC3,RUVBL2,RAD50	1.83499	0	0.0186855
GSE16755_CTRL_VS_IFNA_TREATED_MAC_DN	post2ndALVAC.24hours	-1.75732	0	0.0190543	SLC25A28,TDRD7,IRX4,GUCY1A3,N4BP1,NFKBIA,TRIM21,NMI,USP15,RBM43,MASTL,RELA,DHX58,FAM46A,MAD2L1BP,STAT4,FAM188A,CMPK2,CFB,STX11,GBP1,CD40,TNFSF10,HIVEP2,NLRC5,DNAJB6,JAK2,UBE2D3,PSMA6,NUB1,MCOLN2,GBP2,IDO1,ELL2,PPM1K,DTX3L,PSMA2,TNFAIP8	1.7072	0	0.0465615
CHR12Q14	post2ndALVAC.24hours	-1.75604	0.00687285	0.0192434	LEMD3,RAP1B,USP15,NUP107,TBK1,TMEM5,MDM2,COL2A1,TSPAN8	1.73902	0.00137174	0.0381658
GSE13484_UNSTIM_VS_YF17D_VACCINE_STIM_PBMC_DN	post2ndALVAC.24hours	-1.75463	0.00144718	0.0194393	TNFAIP6,ISG15,C1GALT1,SLC30A3,IFI6,C6orf105,IFITM1,ARNTL2,UPB1,IFIT1,OASL,OAS2,ISG20,IKZF3,IFIH1,BARD1,NOV,IFI44L,TDRD7,STAP1,TRIM14,DDX60,TRAF3IP2,N4BP1,STAT1,BATF,PLSCR1,TRIM21,NMI,USP18,OAS1,CHMP5,DHX58,SPATS2L,AIM2,TAP2,GBP1,IRF7,TANK,IL1RN,KCNA3,TNFSF10,SOCS1,GTPBP2,ARID5B,RAPGEF2,RIPK2,LAG3,FANCA,TAP1,DNAJA1,SP140,PSMA4,TNFAIP8	1.83911	0	0.0183737
ATACTGT_MIR144	post2ndALVAC.24hours	-1.75169	0.00146199	0.0197493	NIN,ARFGEF1,WTAP,FMN2,NFE2L2,PUM1,SS18,MAPK6,CLK1,MTPN,KBTBD8,ZNF800,PAFAH1B1,FAM126B,ZEB2,SRSF10,ARID5B,CPEB2,USP42,UBE2D3,PDE4D,FBXO32,CHTOP,EIF4G2,NRP2,ELL2,UBR3,IDH2,CAPZA1,ARID2	1.71022	0	0.0460402
GSE3982_DC_VS_BASOPHIL_DN	post2ndALVAC.24hours	-1.75175	0	0.0197733	JARID2,CXCR4,TRA2A,FRMPD1,ISG20,DIDO1,PEX1,RHOH,KIF21B,STK38,MANBA,GIT2,INTS12,MAGEF1,MIA3,BRD7,ITGA4,NUCB2,STAP1,CHN1,PRPF3,RPL6,MPHOSPH9,FBLN5,ZMYND8,P2RY10,PRMT2,CAPRIN2,SPOP,AKR1C3,SIAH2,EXT1,SMYD3,PDE4D,NECAP1,CYSLTR1,SRSF4,S100PBP,TERF2IP,TPR	1.76183	0	0.035286
GSE40274_FOXP3_VS_FOXP3_AND_HELIOS_TRANSDUCED_ACTIVATED_CD4_TCELL_DN	post2ndALVAC.24hours	-1.74802	0.00306748	0.0202138	PNPLA8,TIRAP,WDR75,ZMYM5,KCMF1,MTERFD3,KRIT1,SLC15A2,FBXO4,CHD1,SCFD1,REV3L,GPR183,HLCS,FAM82B,FOLR4,ARID4A,RER1,ANKRD28,NFKBIA,MPHOSPH9,ARFGEF1,AP4B1,NFE2L2,VPS54,AKAP11,CLCF1,ARAP2,AIM2,HPS3,HECTD1,ZRANB1,ERBB2IP,KBTBD3,DDX26B,CEP350,TRAPPC6B,TIAL1,PRMT3,PCF11,CNOT7,RAD50,ROCK1,SLAMF6	1.70443	0	0.0470648
GCM_UBE2N	post2ndALVAC.24hours	-1.74712	0.00313972	0.02038	SMC3,PPIG,RANBP6,PRKRA,EIF4ENIF1,CREB1,CEP170,LUC7L3,FBXO3,UBE2E3,POGZ,VDAC3,TMEM183A,HECTD1,SYNC,HNRNPH3,PTBP2,DYNC1I2,YTHDC1,RALGAPA1,CHTOP,LEMD3,RSBN1,ADNP,RAN,HNRNPR,TRIM33,ZFAND5,ZMYM2	1.78041	0	0.0296813
GSE40493_BCL6_KO_VS_WT_TREG_UP	post2ndALVAC.24hours	-1.74699	0.00149031	0.0203898	TRRAP,RPAP3,NLRP3,UBE2Q1,CEP170,CHMP1B,UBA6,ZC3H11A,GOLGA4,TPRKB,RWDD1,ARHGEF7,GOLGA5,CUL1,SSH3,CFDP1,EZR,DDX54,ADAM10,MPHOSPH10,VPS13D,CASP8,PTP4A2,RAD50,HSPH1,TSNAX,NCK1,USP47,TFG,CRBN,GNPDA2	1.73456	0	0.0396093
GSE10239_MEMORY_VS_KLRG1HIGH_EFF_CD8_TCELL_DN	post2ndALVAC.24hours	-1.74439	0	0.0206834	PLSCR1,NIN,CKS2,DR1,FAM91A1,CAT,IDE,POGZ,MRPL15,AP1G1,FRMD4B,NPAT,TMEM183A,KIFC1,BMP2K,RAD51C,YWHAZ,ANXA2,SNIP1,VASH1,SRSF10,SNX10,RAPGEF2,HCCS,ACTL6A,ZBTB2,CNOT7,PSPC1,ACOT9,TRA2B,PPP2R5E,SLC25A4,ITPR1,MAP3K7,NARS,YTHDF1	1.72808	0	0.0412242
GSE42021_TREG_PLN_VS_TREG_PRECURSORS_THYMUS_DN	post2ndALVAC.24hours	-1.74405	0	0.0207096	IFIT1,OASL,DCP1A,OAS2,ISG20,SCAMP1,IFIH1,GTPBP1,WBP4,IFI44L,SLC25A28,TDRD7,TAPBP,WDR91,TRIM14,DDX60,SMARCA5,STAT1,PLSCR1,TRIM21,NMI,USP18,OAS1,CHMP5,FAM46A,SPATS2L,PLXNB3,CFB,TAP2,GBP1,RBBP6,IRF7,PARVA,TNNC2,TNFSF10,SOCS1,EXT1,GTPBP2,PSME2,CASP8,CASP7,TAP1,ELF1,PSME1	1.74165	0	0.0380485
REACTOME_CYTOKINE_SIGNALING_IN_IMMUNE_SYSTEM	post2ndALVAC.24hours	-1.74034	0	0.0212899	PTPN6,IFI6,NEDD4,IL7R,NUP50,IFIT1,IL6ST,IP6K2,OAS2,FYN,ISG20,HGF,PPM1B,PIK3CA,NRAS,CISH,PRLR,IL1RAP,IL7,NUP107,USP18,OAS1,MAP2K1,GH1,GH2,GBP6,GBP1,IRF7,RAPGEF1,CSF2RB,IL1RN,NUP35,NUP205,MAP2K6,IKBKB,NUPL2,JAK1,JAK2,PTPN1,KPNA2,GBP2,NUP210,EIF4G2,EIF4A1,EIF4A2	1.75461	0	0.0360095
GSE29618_BCELL_VS_PDC_UP	post2ndALVAC.24hours	-1.73994	0	0.0213278	NLRP1,EIF2AK3,ATP2B1,ISG20,RHOH,CHD7,IGKC,CXCR5,CD48,STAP1,MSN,PION,PWP1,TRAF5,TUBA4A,NFKBIA,CD83,CLIC4,HIF1A,TSC22D3,AIM2,FCRL2,MMD,P2RY10,MYC,PLEKHF2,BMP2K,TANK,KCNA3,RAB30,ARID5B,EZR,TMEM2,SP140,MYCBP2,PPP1CC,TXNIP,PAPOLA	1.74852	0	0.0363583
PECE_MAMMARY_STEM_CELL_DN	post2ndALVAC.24hours	-1.7395	0	0.0213682	IMPAD1,TIA1,GUCY1B3,ARHGEF2,EPS15,TCF7L2,CALD1,XRN2,MARCH7,TRIO,EMP1,JMJD1C,MMP14,ZDHHC6,CDC16,TM9SF2,CHN1,AK2,KIFAP3,UBL3,SQLE,EPB41L3,CDC5L,KLHL28,KLF12,RASA1,TIMM23,FAP,REXO2,XRCC5,NASP,SLC24A2,JAK1,PDIA3,PCM1,ATRX,BTF3L4,RNF146,SRSF7,TXNIP,ITGB1	1.88936	0	0.0124521
GSE45739_NRAS_KO_VS_WT_ACD3_ACD28_STIM_CD4_TCELL_UP	post2ndALVAC.24hours	-1.73063	0.00153139	0.0226916	RSC1A1,CCNE1,SNRPB2,TRNT1,SPRED2,FOXN2,KIF21B,OTUD4,TFAM,RPP40,KCTD9,BZW1,SH2B3,IMPA1,WDR12,STAT4,CMPK2,SEC24A,DUSP6,CRLF3,ZNF330,ATP8B2,DNAJA3,HIVEP2,SRSF10,UTP14A,BTG3,SAMSN1,BCCIP,DRG1,GEMIN6,SRSF7,LTV1,CCT8,NUP153,CCT6A,DHX15,RAP1B	1.75694	0	0.0358375
GSE2706_UNSTIM_VS_8H_LPS_AND_R848_DC_DN	post2ndALVAC.24hours	-1.7279	0.00148148	0.023021	DDX60,GRHL1,CMTM6,BATF,PLXNC1,SELK,USP18,STAT4,CMPK2,CLCF1,ARAP2,AIM2,CD200,STX11,IRF7,SERPINB7,KCNA3,SIAH2,TMEM41A,BIRC2,EXT1,SOS1,TARP,BTG3,RAPGEF2,MYO10,ANKRD22,RIPK2,HES4,PSMA6,NUB1,EZH2,NFKB1,HIVEP1,MORF4L2,TNFAIP8	1.8143	0	0.0216181
GSE41978_ID2_KO_VS_BIM_KO_KLRG1_LOW_EFFECTOR_CD8_TCELL_UP	post2ndALVAC.24hours	-1.7271	0	0.0230519	TOP1,GTF2B,PML,BTN3A3,PARP12,ISG15,SNRK,RNF19B,BCL6,STAT3,TRIO,IFIT1,OASL,WARS,RARS,RMND1,CSF1,CSTF3,ISG20,CAND2,IFIH1,RCN1,SLC25A28,TAPBP,TRIM14,HK1,DDX60,RPA2,STAT1,PLSCR1,TRIM21,NMI,TAP2,GBP1,IRF7,CYB5A,SOCS1,HNRNPH2,ARID5B,JAK2,PSMB10,PSME2,RBM4,CASP8,GBP2,CASP7,TAP1,ZNF410,IDO1,LIPT1,ITK,SERPING1	1.709	0	0.0458276
GSE36527_CD62L_HIGH_VS_CD62L_LOW_TREG_CD69_NEG_KLRG1_NEG_UP	post2ndALVAC.24hours	-1.72661	0	0.0230923	DLD,OASL,F13A1,LIG3,OAS2,TOPBP1,CHD1,GPM6B,RHOH,SRGAP3,SPTBN1,TAPBP,CHCHD6,ITGA4,NKAP,APAF1,WDR43,ZNF639,N4BP1,CMTM6,STK24,STAT1,RPL6,CCNL2,WIPF1,CD200R1,NIN,FAM133B,RBM43,USP18,DHX58,CLIC4,HUWE1,HIF1A,UHRF1,MOV10,CRLF3,IRF7,RPL3,ETFA,KCNA3,YWHAZ,GRK6,BIRC2,ARNT,FGL2,FXR1,EVI2B,TAP1,USO1,NUP153,B3GNT2	1.88338	0	0.0133727
GO_CYTOPLASMIC_MRNA_PROCESSING_BODY	post2ndALVAC.24hours	-1.72156	0.00490196	0.0238234	PAN2,TRIM21,PUM1,EDC3,MOV10,CNOT2,PATL1,BTBD1,EIF2C1,PSMA6,RC3H1,CNOT7,PSMA4,PSMA2	1.7977	0	0.0250103
GSE9988_ANTI_TREM1_VS_LPS_MONOCYTE_DN	post2ndALVAC.24hours	-1.72171	0.0015361	0.0238341	TAGAP,IL23A,NLRP3,STAT5A,PLXNC1,NFKBIA,NIN,NFE2L2,CLIC4,CLCF1,STX11,PTX3,GBP1,PLEKHF2,CD40,TANK,KCNA3,BAZ1A,BIRC2,UGP2,GCH1,TARP,SNX10,BTG3,RAPGEF2,RIPK2,SAMSN1,PSMA6,NFKB1,PLAC8,MCOLN2,HNRNPC,DNAJA1,PPM1K,TNFAIP8	1.78618	0	0.0279
GSE40685_TREG_VS_FOXP3_KO_TREG_PRECURSOR_DN	post2ndALVAC.24hours	-1.71363	0	0.0252594	TRIM69,CISH,IFI44L,PRLR,SETBP1,DDX60,IL7,SSPN,STAT1,BATF,ZNF337,TCN2,CUL1,AIM2,SIGLEC1,CRLF3,CENPJ,CD40,GLRX,TNFSF10,HIVEP2,ST8SIA4,DAZAP2,GCH1,NLRC5,SNX10,PDE7A,JAK2,SETDB2,NUB1,POLR2B,CASP7,PDCD1LG2,SERPING1,PSME1,PSMA2	1.93239	0	0.00884403
GSE37533_PPARG1_FOXP3_VS_PPARG2_FOXP3_TRANSDUCED_CD4_TCELL_PIOGLITAZONE_TREATED_DN	post2ndALVAC.24hours	-1.70696	0	0.026577	PML,CASP10,BTN3A3,PARP12,ISG15,SNRK,NDST2,RNF19B,BCL6,UBA7,IFITM1,ENY2,NF1,IFIT1,WARS,OAS2,CSF1,IFIH1,SFT2D2,IFI44L,SLC25A28,TDRD7,SETBP1,TRIM14,SDAD1,DDX60,STAT1,PLSCR1,DNAJA2,TRIM21,NMI,USP15,USP18,OAS1,CBR3,TAP2,GBP1,SETX,CTRL,TANK,SIAH2,BAZ1A,SOCS1,GCH1,JAK2,RIPK2,PSMB10,PSME2,GBP2,CASP7,TAP1,IDO1,DNAJA1,PSMA4,PSME1	1.89672	0	0.0116905
GSE5589_WT_VS_IL10_KO_LPS_STIM_MACROPHAGE_45MIN_UP	post2ndALVAC.24hours	-1.70547	0.00152672	0.0268881	PIR,COPZ2,G2E3,EDNRB,LRIF1,ALS2CL,EYA1,CENPH,DHX35,SLC38A10,VRK1,AGXT2L2,ESPL1,GPR183,MNAT1,UBN1,RBM3,CEP85,MRPS33,PFKM,LY6H,HK1,TBC1D9,RBM43,EPB41L3,CDCA2,NFE2L2,CEP55,POT1,HNRNPA1,ARPC2,NUDT21,CEP192,GTF2H2,KATNB1,HSP90B1,KIAA1524,AFP,PRPS2,EI24,DPYSL2,ZC3H4,EVI2B,SORBS3,SHC4,CCND3,CYSLTR1,RNF19A,CAPZA1	1.7443	0	0.0375586
GNF2_RAP1B	post2ndALVAC.24hours	-1.70175	0.0118644	0.0276001	CD97,BIN2,BTN3A3,ELF4,VPS16,GPR65,OSTF1,RAC2,STK38,MSN,RASSF1,JAK1,ADAM10,MAT2B,RAP1B	1.80112	0.00131926	0.0241115
GO_MRNA_3_UTR_BINDING	post2ndALVAC.24hours	-1.69865	0.00490196	0.0281592	HNRNPK,SYNCRIP,CRYZ,CIRBP,PUM1,SECISBP2,CPEB2,HNRNPA2B1,FXR1,RBM4,RC3H1,HNRNPC,HNRNPD,HNRNPR	1.76325	0.00379747	0.0346459
GSE17721_0.5H_VS_12H_POLYIC_BMDC_DN	post2ndALVAC.24hours	-1.69159	0.00298507	0.0294409	APPBP2,CMTM6,CHMP1B,TRAF5,LUC7L3,TBK1,TPRKB,DUSP26,VPS54,PLXNB3,NCOA3,PLEKHA3,CCNT2,ARF4,PLEKHF2,KTN1,DHX8,CAMK2D,ANXA1,ZEB2,TJAP1,MCL1,CEP350,FASTKD5,SNX10,ATP13A1,RIPK2,NAE1,GBP2,ILF3,CACYBP,STARD3NL,GTF2E2,USP47,ANGPT1,PSMA4,ADNP	1.76872	0	0.0341788
GSE46606_UNSTIM_VS_CD40L_IL2_IL5_3DAY_STIMULATED_IRF4MID_SORTED_BCELL_DN	post2ndALVAC.24hours	-1.68413	0.00299401	0.0310982	FBXO11,RHOH,CPNE3,CDK5R1,CISH,ATP6V1C1,DNAJC7,EIF4ENIF1,PTTG1,GABPB1,BATF,TRAF5,NFKBIA,USP15,OAS1,CCL1,FAM188A,TIPARP,ARAP2,GBP6,BHLHE40,DDX1,ARF4,TOX4,MFHAS1,FGL2,AXL,GPR18,EEF1E1,JAK2,RIPK2,SETDB2,MLKL,INTS8,TMEM2,ADM,CASP8,GBP2,HNRNPC,GTF2E2,ARHGEF3,B3GNT2,PLAGL1,NUDT9	1.78505	0	0.0282516
GSE7852_TREG_VS_TCONV_DN	post2ndALVAC.24hours	-1.68355	0	0.031181	CHD7,NTRK3,PTPN11,PAPD5,GTF2I,IKZF1,B3GALT4,ENTPD5,PDE3B,GGT1,PCCB,NFE2L2,GABRG2,MAD2L1BP,INPP1,DUSP6,MAP3K1,KLRD1,GRK6,MCTP2,ARL4C,SIAH1,SETDB2,RMND5B,EVI2B,RNF146,IDO1,KCTD2,MBOAT4,ITPR1,ITK,RNF19A,PAG1	1.89722	0	0.0119783
BIOCARTA_P38MAPK_PATHWAY	post2ndALVAC.24hours	-1.67584	0.0134228	0.0324784	CREB1,STAT1,HSPB2,MYC,MAP3K1,MAP2K6,RAPGEF2,MEF2C,CDC42,MEF2A,MAP3K7	1.73943	0	0.0384456
GSE11864_UNTREATED_VS_CSF1_IFNG_IN_MAC_DN	post2ndALVAC.24hours	-1.67331	0.00144928	0.0329079	IPO9,EIF2AK3,CSTF3,ISG20,SDS,NUDCD2,RAB7A,GTF2IRD1,MRFAP1L1,GIT2,CKAP5,IFI44L,DUSP11,NSMCE4A,CHCHD1,ZFYVE16,MOB3C,MAEA,YIPF4,CFB,MOV10,DDX1,NIM1,SRP68,KIAA1826,ZNF146,STX7,SIAH1,PDE7A,ACTL6A,MAT2B,CXorf40A,MCOLN2,SLC15A4,RPE,CACYBP,PLRG1,MRPS31,ZNF274,DTX3L,NFX1,CD81,CNOT4	1.69938	0	0.0492951
GO_RNA_POLYMERASE_II_DISTAL_ENHANCER_SEQUENCE_SPECIFIC_DNA_BINDING	post2ndALVAC.24hours	-1.67352	0.00628931	0.0329086	MTA2,SMARCA4,CDX1,CREB1,MED12,RELA,NFE2L2,RBBP4,ACTL6A,NFKB1,HIVEP1,RUVBL2,HNRNPC,MEF2C,NONO,H2AFZ	1.7379	0.00249688	0.0385757
GEISS_RESPONSE_TO_DSRNA_UP	post2ndALVAC.24hours	-1.66728	0.00689655	0.0338495	CHN1,NFKBIA,NMI,IQGAP2,PSMA3,GBP1,BIRC2,ANXA1,GCH1,TAP1,ACSL3,XPO1	1.75267	0.00134228	0.0360619
GSE24210_RESTING_TREG_VS_TCONV_UP	post2ndALVAC.24hours	-1.66627	0	0.0338905	FAM117A,CTSH,TNKS,JMJD1C,RHOH,OXR1,MTMR14,MANBA,NUCB2,KIAA0101,TRAF3IP2,SH2B3,AP3B1,NAAA,SIPA1,RBM43,RSF1,ARHGAP18,ERLIN1,TRAF3,SMPDL3A,RPA1,SESN1,MAP7,ZMYND8,HHEX,ITM2B,CEP192,RAPGEF1,PRR13,EP300,STIM2,ANXA1,SERINC3,CEP350,JAK1,TMEM14A,POLD1,EVI2B,ROCK1,ITPR1,CENPK,NAPG,INPP4B	1.79035	0	0.0269289
MEK_UP.V1_DN	post2ndALVAC.24hours	-1.65875	0	0.0354708	IFIT1,OASL,PMS1,UBA3,RMND1,OAS2,JMJD1C,IFIH1,ARMCX3,RHOBTB3,NGLY1,KCTD3,IFI44L,TDRD7,ARMCX1,TRIM14,GALC,CHN1,TTC39A,DDX60,NPEPPS,WIPF1,SLC26A2,GOLGA4,STXBP3,INPP5F,USP18,CETN3,OAS1,SMPDL3A,POT1,AUTS2,MYC,MYBL1,IRF7,HIST1H2AC,TOP2B,SYCP2,MOCOS,UTP14A,SNX10,PTBP2,JAK2,PRMT3,CASP8,TAP1,RALGAPA1,RSBN1,ID2,INPP4B,SSFA2	1.75008	0	0.0362799
GSE10325_CD4_TCELL_VS_BCELL_DN	post2ndALVAC.24hours	-1.65759	0.00152905	0.0356099	IGJ,IGKC,CXCR5,KIAA0182,OSBPL10,ARHGAP24,SNX3,STAP1,TLE1,SETBP1,VAV3,TBC1D9,CD83,FADS3,CLIC4,FAM3C,AIM2,CD200,ARHGAP17,FCRL2,HHEX,CD40,RAB30,LRMP,VPREB3,MICAL3,MARCH1,BEND5,STX7,PLAC8,TSPAN3,MEF2C,SYNGR2,SP140	1.98886	0	0.00692048
FOSTER_TOLERANT_MACROPHAGE_DN	post2ndALVAC.24hours	-1.65723	0	0.0356279	JARID2,CSF1,WHAMM,TMEM30A,RHOH,IFIH1,GPSM2,RCN1,ITPKB,PAPD7,CITED2,ETNK1,DUSP14,APAF1,WDR43,N4BP1,STAT5A,CMTM6,WHSC1L1,ODC1,TIPARP,MMD,CENPJ,PARP8,PLEKHF2,CD40,ZNF800,TNFSF10,CAMK2D,GPR84,EZR,USP42,MYO10,SAMSN1,DLL1,TMEM2,CASP7,CASP12,PPM1K,PLAGL1	1.75856	0	0.0359559
GSE15930_STIM_VS_STIM_AND_TRICHOSTATINA_24H_CD8_T_CELL_DN	post2ndALVAC.24hours	-1.65666	0.00150376	0.0357432	DMRT1,FKBP1A,RMND1,HSD17B11,KIAA0368,COASY,TYSND1,SLU7,PGAM1,RER1,CISH,SEPT10,TCEA1,SLC25A28,FRAT1,INHBC,TM9SF2,PPIE,IMPA1,ENO1,SELK,PSMC1,LUC7L3,DCUN1D5,PEMT,INPP1,COQ9,FAM105A,IRF7,POP4,TANK,KTN1,NCOA2,RBBP4,IKBKB,GCH1,MOGAT2,INTS8,ZNF274,NFU1,SYNGR2,MLLT1,COPS3,RBM26,SON,S100PBP	1.84975	0	0.0174964
GNF2_CD53	post2ndALVAC.24hours	-1.65492	0.0162866	0.0362181	ELF4,PTPN6,OSTF1,CORO1A,RAC2,GIT2,TAPBP,CD48,WIPF1,SASH3,CRLF3,GRK6,CSK,PSMB10,TAP1,PSME1	1.75191	0.00383632	0.0358118
GSE22886_IGG_IGA_MEMORY_BCELL_VS_BM_PLASMA_CELL_UP	post2ndALVAC.24hours	-1.65357	0.00148368	0.0364923	DAAM1,COL6A3,FYN,CDKN2D,CORO1A,RPS3,CLMN,STK38,ZDHHC6,TIPRL,GIT2,ATP6V1B2,VAV3,SLC25A24,STK24,ECT2,DR1,MYL12B,CAT,CASP8AP2,AKAP11,ANXA10,HUWE1,SNAP23,AIM2,POGZ,POLDIP3,MYL12A,BAZ1A,IKBKB,DAZAP2,ATP6V1H,SNX10,MARCH1,STX7,MAT2B,PDCD10,TTC31,PIGG,TNIK,SRSF7,PPP1R12A,DDX5,XPO1,RAP1GDS1,TAF7,METTL4,TNFAIP8	1.69775	0.0021692	0.0498152
GSE6259_FLT3L_INDUCED_DEC205_POS_DC_VS_CD4_TCELL_UP	post2ndALVAC.24hours	-1.6515	0.00459418	0.0369822	DIP2B,TXNDC5,CDK2AP1,COBRA1,ARHGAP24,FAF1,PARP1,PKHD1,RALGPS2,GOLGA4,ASZ1,PHRF1,ZMYND11,DR1,FAM46A,TMEM135,P2RY10,HHEX,NME7,HIVEP2,ST7L,BYSL,PPP2R5C,ANKRD11,TGIF1,DYNC1I2,RAPGEF2,SETDB2,TUFM,IMMP1L,SPG21,MEF2C,ILF3	1.8084	0	0.0228362
BASSO_CD40_SIGNALING_UP	post2ndALVAC.24hours	-1.65078	0.00792393	0.0372182	CHD1,GPR183,RAC2,NCKAP1L,CD44,CXCR5,SH2B3,STAT5A,STAT1,BATF,PLXNC1,NFKBIA,CCL3,CD83,CD40,HSP90B1,ARID5B,TAP1,MEF2C,ELL2,SYNGR2,TNFAIP8	1.96849	0	0.00705667
GSE34156_UNTREATED_VS_6H_NOD2_LIGAND_TREATED_MONOCYTE_DN	post2ndALVAC.24hours	-1.64909	0.00294118	0.0375758	CASP1,TMEM87A,CSRNP1,PML,PARP12,MTMR11,RNF34,NDST2,STAT3,CSPG5,MBD1,ANKS1A,RNF214,MS4A4A,ABI3BP,OAS2,NR3C1,FYN,CORO2A,ZP2,ISG20,GPSM2,TAPBP,TLE1,PTTG1,STAT1,WHSC1L1,LUC7L3,TBK1,TRIM21,NMI,RBM43,USP18,KLHL28,FAM46A,CMPK2,CFB,MOV10,IKZF5,FRMD4B,CENPJ,PARP8,PLEKHF2,TNFSF10,AXL,GTPBP2,DYNC1I2,RAPGEF2,SETDB2,CASP8,GBP2,MEF2C,ELMOD2	1.8902	0	0.0123633
GSE42021_TCONV_PLN_VS_TREG_PRECURSORS_THYMUS_DN	post2ndALVAC.24hours	-1.64858	0.00146413	0.0376562	MARCH7,UGCG,EHD1,DLD,JARID2,MAPRE1,SELP,RELB,SCAMP1,MMP14,MTMR14,MSR1,RNF145,HNRNPK,APAF1,N4BP1,STAT5A,PLEKHA1,DCUN1D5,CIRH1A,HUWE1,HIF1A,MDM2,LCP2,BHLHE40,MYC,KDM3A,G3BP1,LTBP1,CD40,TANK,IL1RN,SOCS1,EXT1,SRSF10,CTPS,SNX10,TBRG4,JAK2,UBE2D3,PSMA6,NFKB1,DDX3Y,PAK1IP1,HIVEP1,MCOLN2,EXOSC5,TAX1BP1,TRA2B,ILF3	1.80235	0	0.0240292
WELCSH_BRCA1_TARGETS_UP	post2ndALVAC.24hours	-1.64623	0.00147059	0.0380688	CITED2,TM9SF2,KIF2A,CREB1,KIFAP3,NPEPPS,EXTL2,SUCLG1,CKS2,DR1,CIRBP,CAT,ATP5F1,ADD3,MAP2K1,ADD1,H1F0,TMPO,TCEAL1,MYL12A,NTS,ANXA2,ANXA1,SERINC3,PPP2R5C,JAK1,COPS2,UBE2D3,PTPN1,KDELR2,MGAT2,MEF2C,TSNAX,ANXA7,ALDH7A1,SDHC,KIF5B,RABGGTB	1.722	0	0.0426345
MORF_RAB6A	post2ndALVAC.24hours	-1.64374	0.0111465	0.0385992	TCEA1,METAP1,ARFGEF1,MYL12B,AHCYL1,COPS5,TIAL1,DYNC1I2,SPCS2,PHF3,SUMO1,MDH1,NONO	1.76783	0.00123305	0.0344038
MODULE_239	post2ndALVAC.24hours	-1.64342	0.0128411	0.0386235	SLMAP,SYPL1,SSR1,TRIM24,IL6ST,ASXL2,RHOBTB3,DNAJC3,ROBO1,CNIH,AP3B1,MAEA,IDE,TBCE,SAR1B,SOS1,DHX9,DYNLT3,CCDC132,SF3B1,PIK3R4,G3BP2,NONO,DDX5,B3GNT2,PPP1CC,ITGB1	1.7207	0.00116822	0.0425021
VERNELL_RETINOBLASTOMA_PATHWAY_UP	post2ndALVAC.24hours	-1.64127	0.00998336	0.0392833	EED,DONSON,CNOT6L,MCM7,PTX3,NPAT,TMPO,CDCA7L,RRM1,BTG3,EZH2,FANCA,CENPK,PTPLAD1	1.70928	0.00483676	0.0459606
PID_NCADHERIN_PATHWAY	post2ndALVAC.24hours	-1.63996	0.0189983	0.0395967	PTPN1,CTNNB1,ROCK1,CDC42,KIF5B	1.80307	0	0.0239585
GSE18791_UNSTIM_VS_NEWCATSLE_VIRUS_DC_6H_DN	post2ndALVAC.24hours	-1.63474	0.00453172	0.0407918	IFIT1,OASL,ELMO2,WARS,OAS2,ISG20,IFIH1,SFT2D2,TRIM69,IFI44L,SLC25A28,TAGAP,DDX60,STAT1,PLSCR1,TRIM21,MASTL,USP18,OAS1,DHX58,FAM46A,CMPK2,AIM2,MOV10,SIGLEC1,IRF7,CCNA2,TNFSF10,SOCS1,GCH1,UNC93B1,NLRC5,USP42,CASP8,TAP1,ACOT9,DTX3L,SEMA4D	1.85855	0	0.016083
GSE2706_UNSTIM_VS_2H_LPS_AND_R848_DC_DN	post2ndALVAC.24hours	-1.63223	0	0.0414125	BATF,SELK,NFKBIA,MASTL,STAT4,CMPK2,ARAP2,CFB,STX11,PLEKHA3,GBP1,IRF7,AFAP1L2,KCNA3,RAB30,SIAH2,BAZ1A,BTG3,RAPGEF2,RIPK2,HES4,EZH2,NFKB1,DDX3Y,HIVEP1,SAR1A,TNFAIP8,RILPL2	1.73345	0	0.0398493
KEGG_PATHOGENIC_ESCHERICHIA_COLI_INFECTION	post2ndALVAC.24hours	-1.62941	0.0158983	0.0421156	ARPC2,TUBAL3,YWHAZ,EZR,YWHAQ,ACTG1,CTNNB1,ROCK1,CDC42,NCK1,ITGB1	1.86904	0	0.0150889
GO_NEGATIVE_REGULATION_OF_CELLULAR_AMIDE_METABOLIC_PROCESS	post2ndALVAC.24hours	-1.6287	0.0030303	0.0421481	EPRS,RPS3,CPEB3,EIF2AK3,HRSP12,PRKRA,EIF4ENIF1,EIF2B5,ZCCHC11,SYNCRIP,CIRBP,CNOT6L,PUM1,MOV10,CNOT2,CAPRIN2,TARBP2,SNIP1,EIF2C1,CPEB2,HNRNPA2B1,EIF2B3,FXR1,RBM4,RC3H1,CNOT7,HNRNPD,ILF3,RAN,HNRNPR,TPR	1.78802	0.00112233	0.0274827
ZHAN_MULTIPLE_MYELOMA_LB_DN	post2ndALVAC.24hours	-1.62673	0.0120275	0.0426855	ZMIZ1,DIRAS2,SEPHS1,CCR2,IFI6,ZC3H12C,FAM70A,MAN1C1,GTPBP1,DDX60,STAT1,WIPF1,TRAF5,USP18,CAP1,HIF1A,DUSP6,PARP8,PSMB10	1.95078	0	0.0073418
GSE21546_ELK1_KO_VS_SAP1A_KO_AND_ELK1_KO_DP_THYMOCYTES_UP	post2ndALVAC.24hours	-1.62288	0.00297177	0.0434971	PPM1B,SCAMP1,NRBF2,GTPBP1,PGAM1,OSBPL10,TRIM69,TDRD7,TAPBP,TRIM14,DDX60,STAT1,PLSCR1,TRIM21,USP18,OAS1,KEL,CMPK2,MOV10,TAP2,IRF7,HIST1H2AC,CLK1,PSMG2,ZNF24,NLRC5,PSME2,INTS8,GCM2,LRCH2,DNAJA1,PPM1K,DTX3L,DDX5,PSME1	1.87665	0	0.014274
HOEBEKE_LYMPHOID_STEM_CELL_UP	post2ndALVAC.24hours	-1.62221	0.00315956	0.0436833	MSL1,EVL,RERE,BCL6,SCN3A,NF1,ATR,TARBP1,NLRP1,SUV420H1,BAALC,SMARCA4,ITGA4,PAPD7,SETBP1,TRAF3IP3,TRAF5,P2RY14,HNRNPA1,KDM3A,RBBP6,SF3B1,MEF2A,EIF4A1,TRIM33,TPR	1.81567	0	0.0213194
GSE43863_DAY6_EFF_VS_DAY150_MEM_TH1_CD4_TCELL_DN	post2ndALVAC.24hours	-1.61592	0	0.0453609	C7orf36,BATF,PLXNC1,PDE3B,CDCA2,CLCF1,ARAP2,GBP6,ZMYND8,NCAM2,MFHAS1,ZRANB1,CRTC2,GPR18,UNC93B1,BEND5,EZH2,LAG3,NFKB1,HIVEP1,GBP2,MYBL2,PPM1K,B3GNT2,RBM26,CD81,PTPLAD1	1.71326	0	0.044905
GSE360_CTRL_VS_L_DONOVANI_MAC_DN	post2ndALVAC.24hours	-1.61561	0.00149031	0.0454345	WBP4,STT3A,OTUD4,IKZF1,LRIG2,PTPN22,AMHR2,PROSC,GTF3C1,PION,TRAF5,HSP90AB1,LETMD1,STXBP3,EPB41L3,UCP3,ATP5F1,ADD3,DHX29,TNP1,ODC1,SNAP23,GPATCH8,TRIM37,CLDND1,PARVA,CD40,CSF2RB,TNNC2,HNRNPH2,MICAL3,HNRNPA2B1,GTF2H1,CTNNB1,PDHX,UBE2V2,RSBN1,NFX1,DHX15,RAP1B,CAPZA1,ZMYM2	1.74034	0	0.038059
GSE9988_LPS_VS_LPS_AND_ANTI_TREM1_MONOCYTE_UP	post2ndALVAC.24hours	-1.61538	0.00151286	0.0454992	IFIH1,STK38,STK17B,EYA3,SLC25A28,IKZF1,RASSF5,IL23A,PTEN,PLSCR1,NIN,EPB41L3,CCL1,SMPDL3A,NFE2L2,CLIC4,XRCC5,MAD2L2,MYL12A,PLEKHF2,CD40,HNRNPH2,UGP2,GCH1,RBM22,ANP32A,ORAI1,TMED7,DNAJB6,SAMSN1,PSMA6,PLAC8,DNAJA1,PPM1K,PSMA4,HNRNPR	1.83171	0	0.0189695
GSE13484_12H_UNSTIM_VS_YF17D_VACCINE_STIM_PBMC_DN	post2ndALVAC.24hours	-1.61149	0.00152207	0.0466794	RBM28,ALAS1,KCNC1,CABYR,PCNX,FAM70A,GNAT3,SFT2D2,SUPT3H,IFI44L,CD48,ASAP1,MAB21L1,NLRP3,GGT1,OLFM1,TBK1,CKS2,USP15,WTAP,CHMP5,DHX58,CLIP3,MAD2L1BP,RCL1,BHLHE40,TAP2,SIGLEC1,PTX3,SERPINB7,CD40,IL1RN,CKS1B,SOS1,MCL1,SNX10,TTLL4,BTG3,JAK2,DZIP1,ADM,SCG5,CASP7,RALGAPA1,MST1R,TNFAIP8	1.8735	0	0.0141613
GNF2_HLA_C	post2ndALVAC.24hours	-1.60511	0.029877	0.0484842	CORO1A,RAC2,TAPBP,CD48,SIPA1,SASH3,TSC22D3,PRR13,GRK6,PSMB10,TAP1	1.99353	0	0.00660529
ICHIBA_GRAFT_VERSUS_HOST_DISEASE_D7_UP	post2ndALVAC.24hours	-1.60367	0.0162338	0.0489013	ISG15,RNF19B,UBA7,CDC42SE2,PLD4,IFIT1,IL6ST,WARS,MSR1,TAPBP,SAAL1,N4BP1,STAT1,NFKBIA,USP18,AKAP9,LCP2,TAP2,GBP1,IRF7,IL1RN,SOCS1,FGL2,SNX10,PSMB10,PSME2,PLAC8,PTPN1,GBP2,TAP1,PSME1	1.85073	0	0.0173893
